# Supplementary material for: gem-Difluorobisarylic derivatives: design, synthesis and anti-inflammatory effect
Source: PubMed Central journal article supplement (PMC6824041; doi:10.1186/s13065-019-0640-5), 2019-10-31

**Additional File 1:** Proton (H), carbon (C) and fluorine (F) NMR spectra for intermediates **4** to **18** and for compounds **A1** to **A5**.

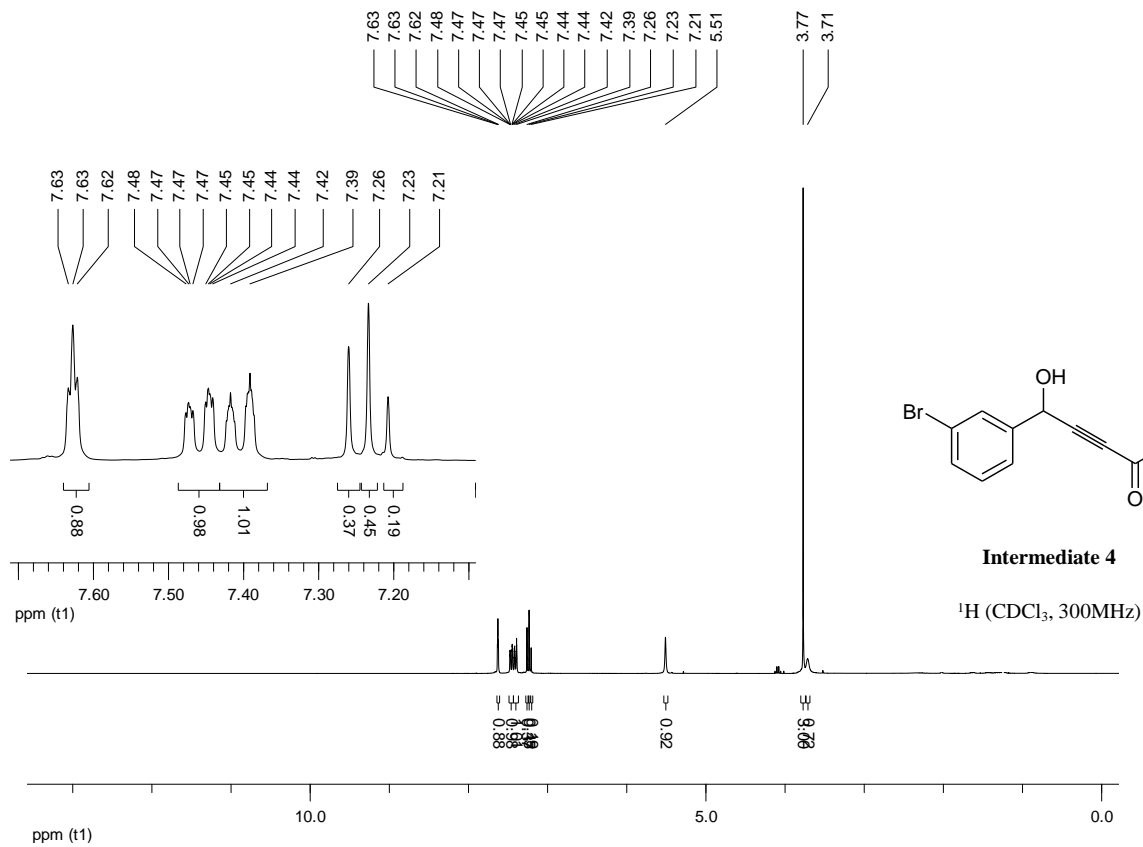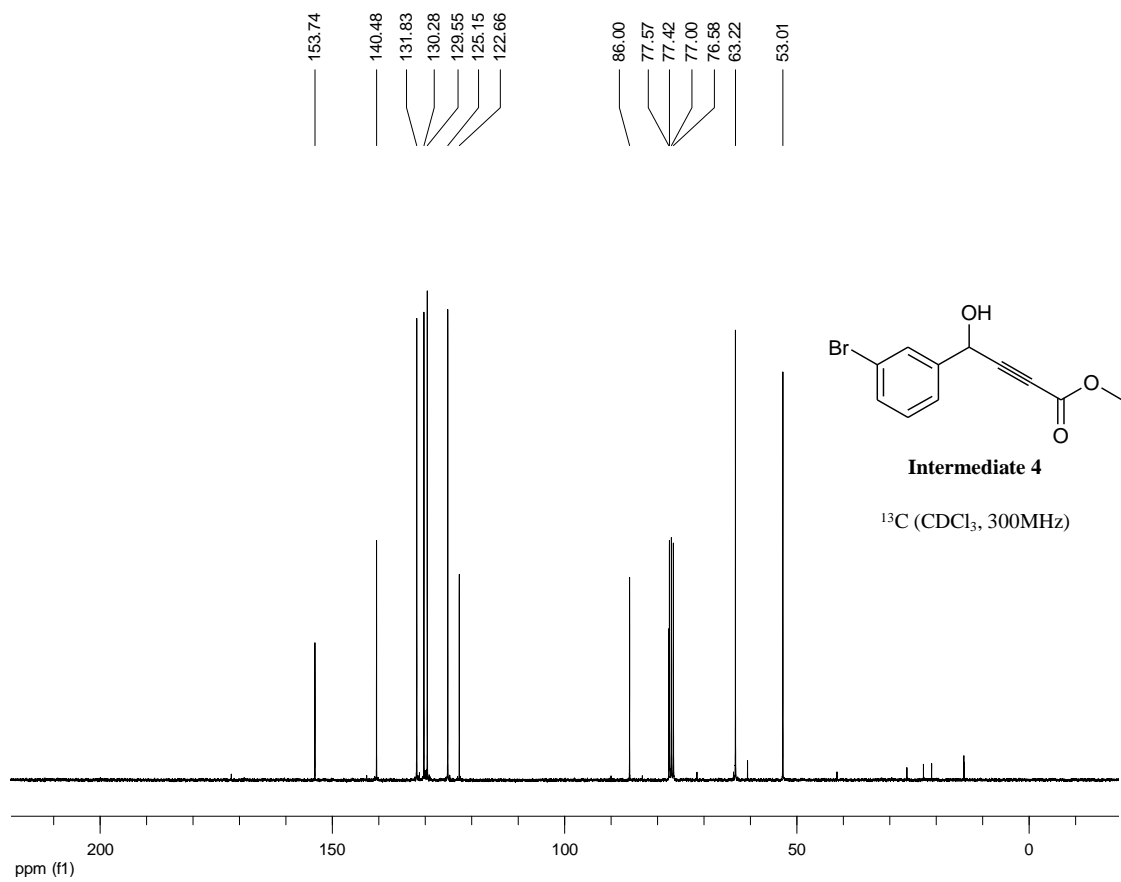

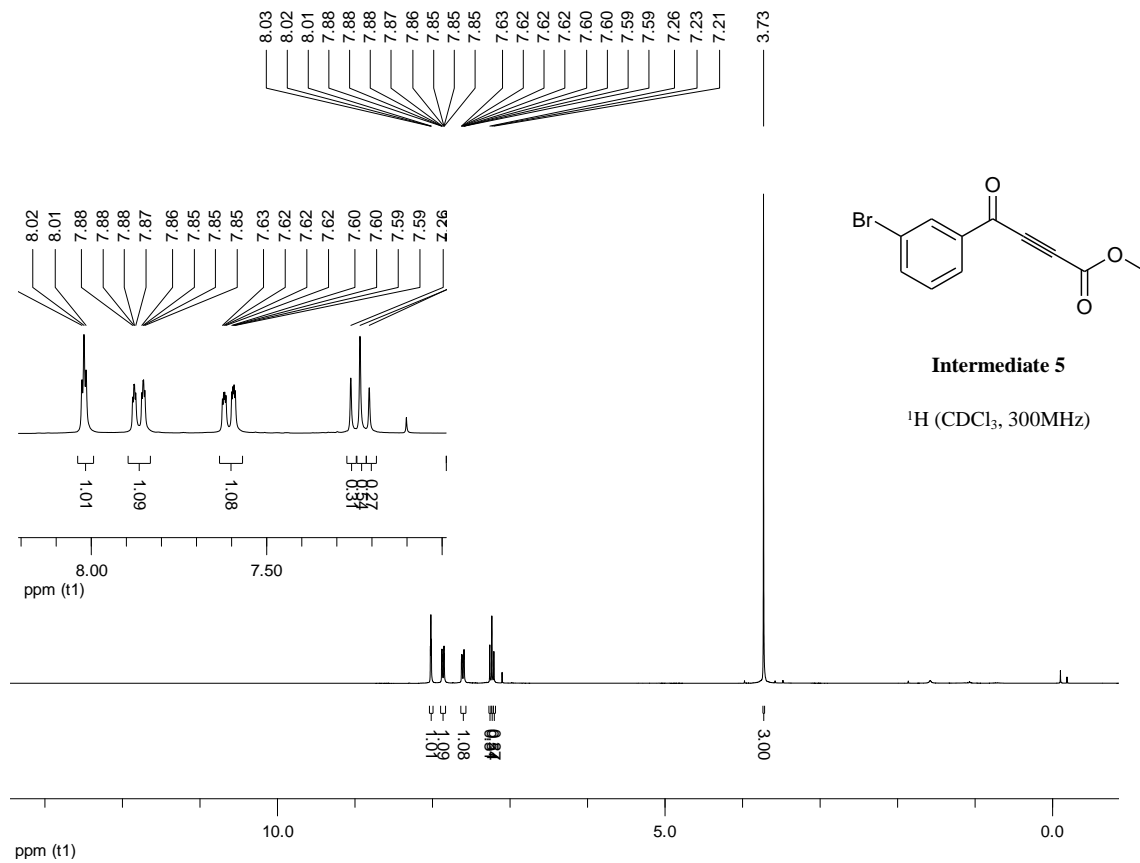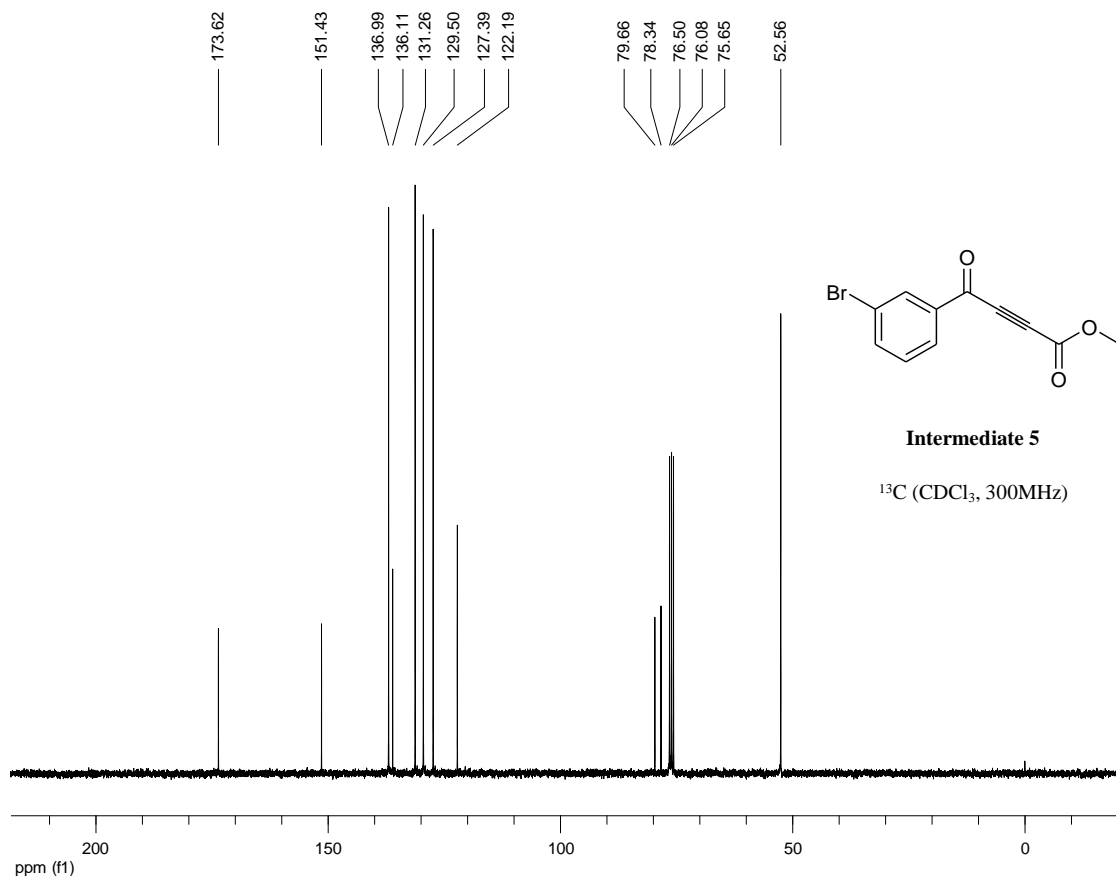

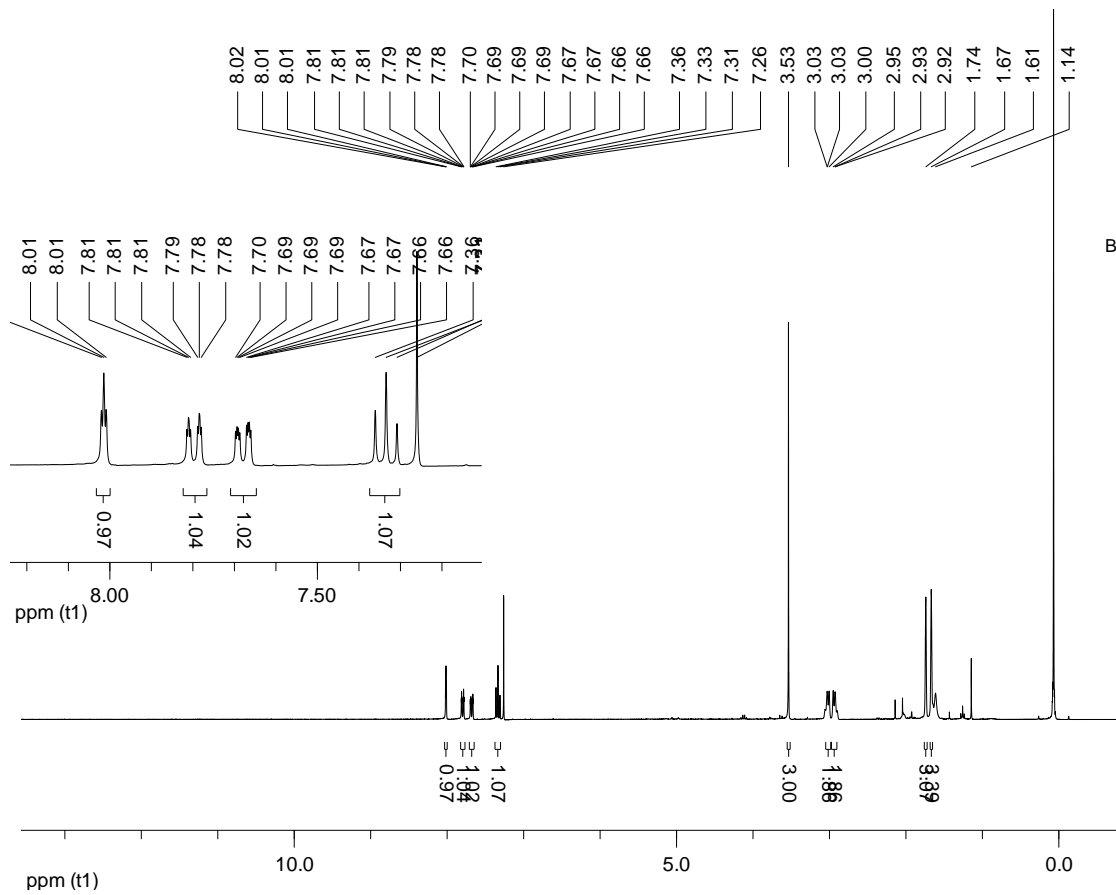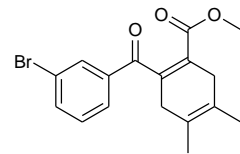

**Intermediate 6**

<sup>1</sup>H (CDCl<sub>3</sub>, 300MHz)

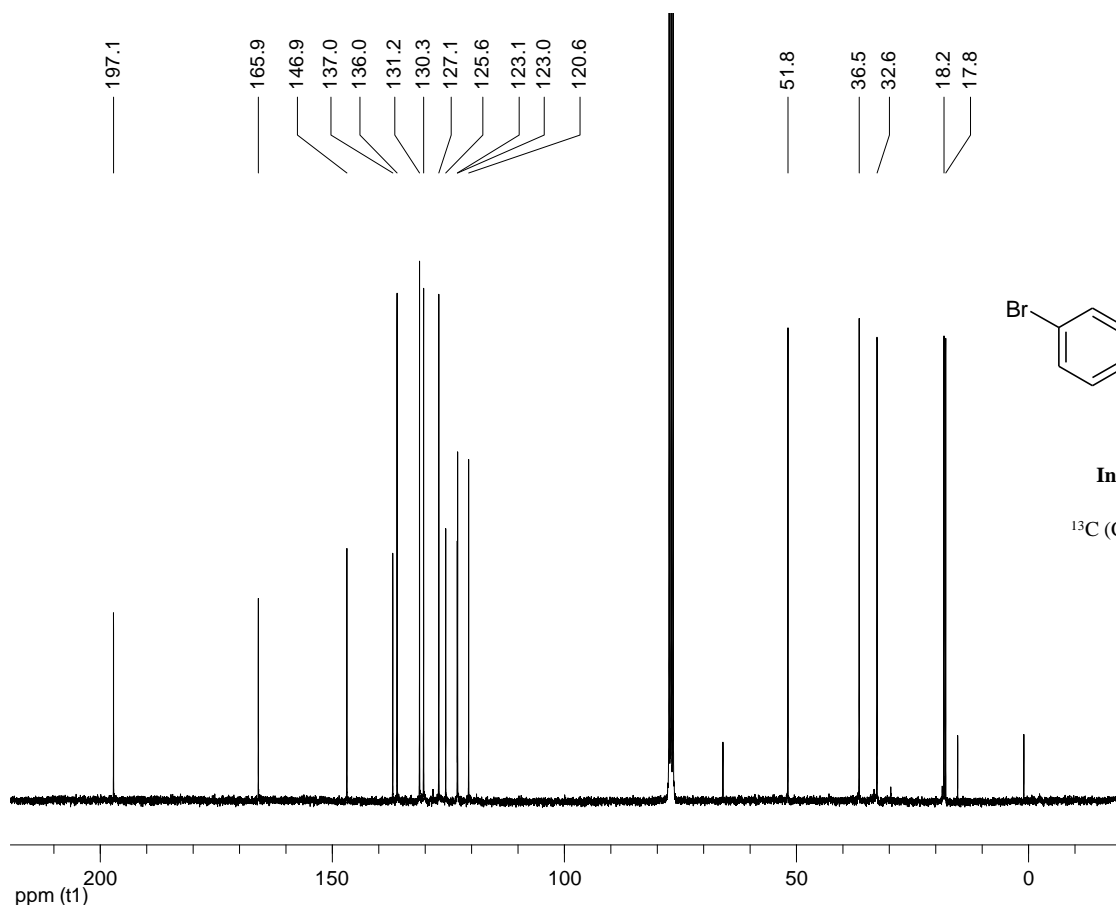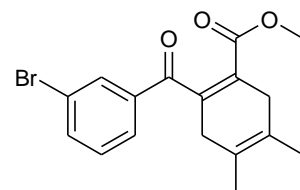

**Intermediate 6**

<sup>13</sup>C (CDCl<sub>3</sub>, 75 MHz)

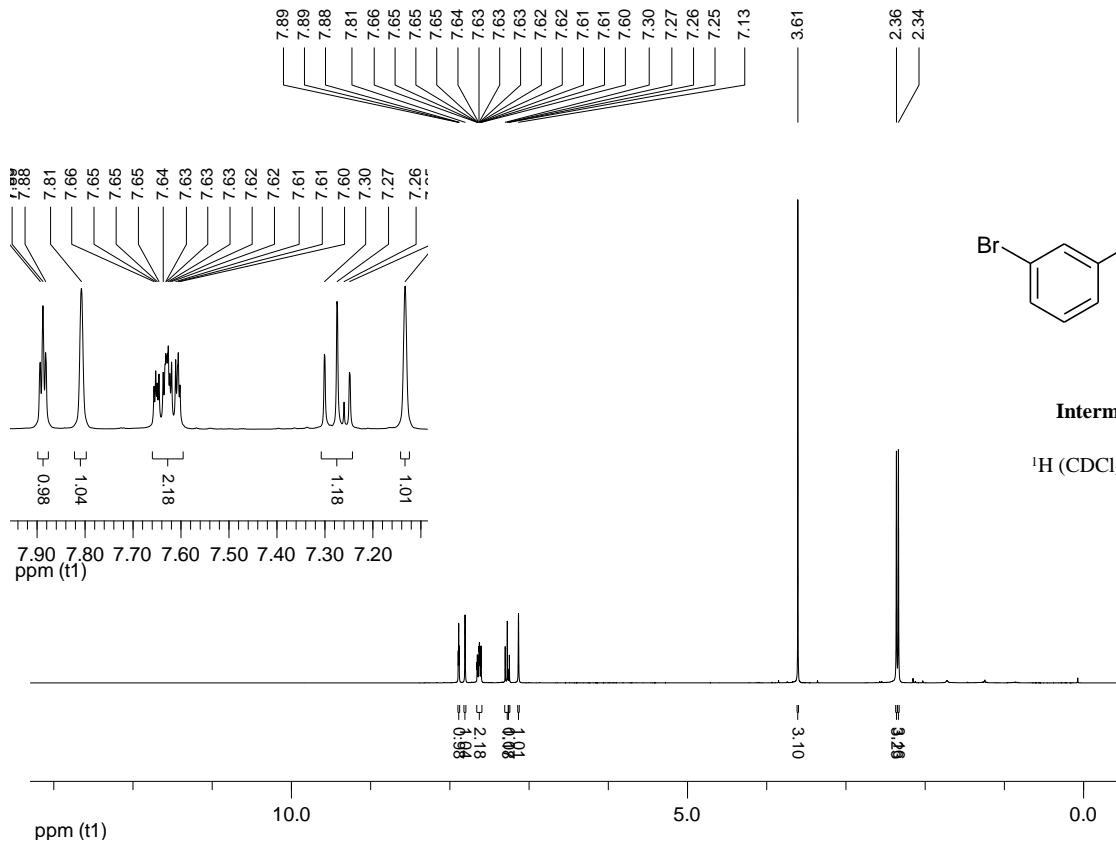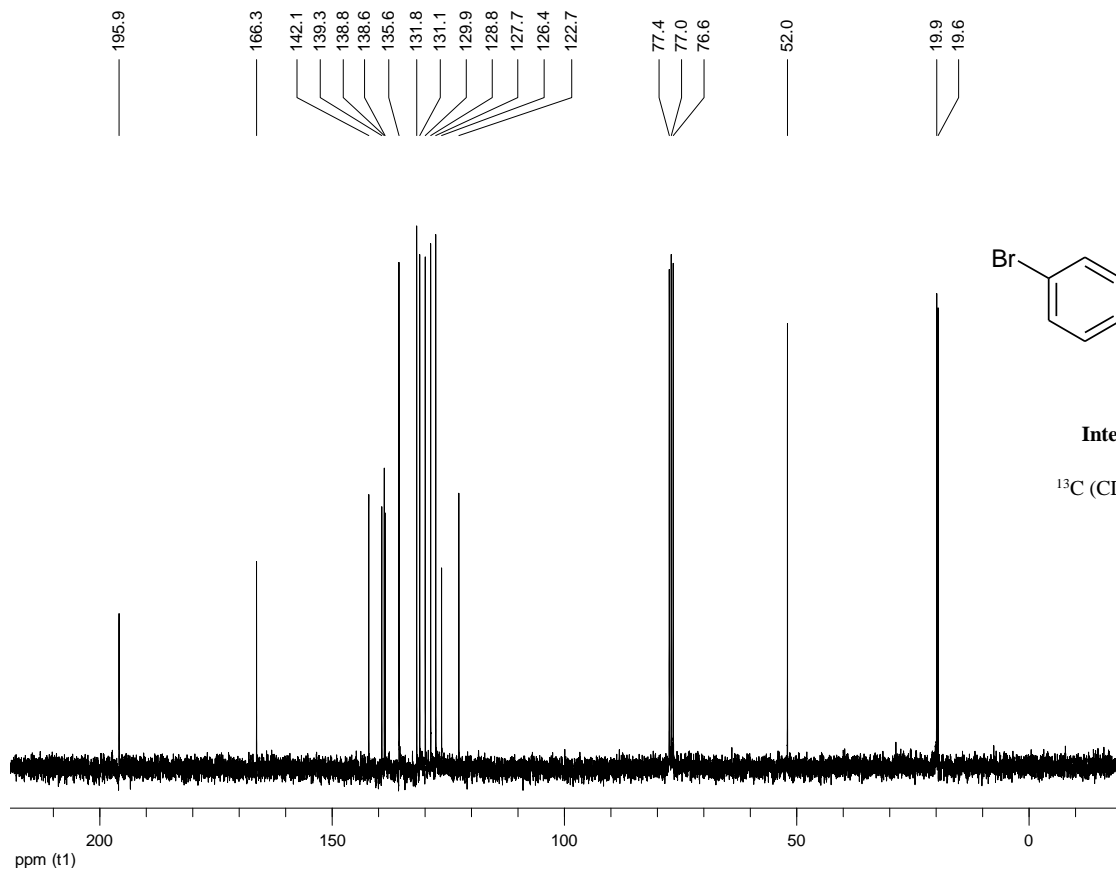

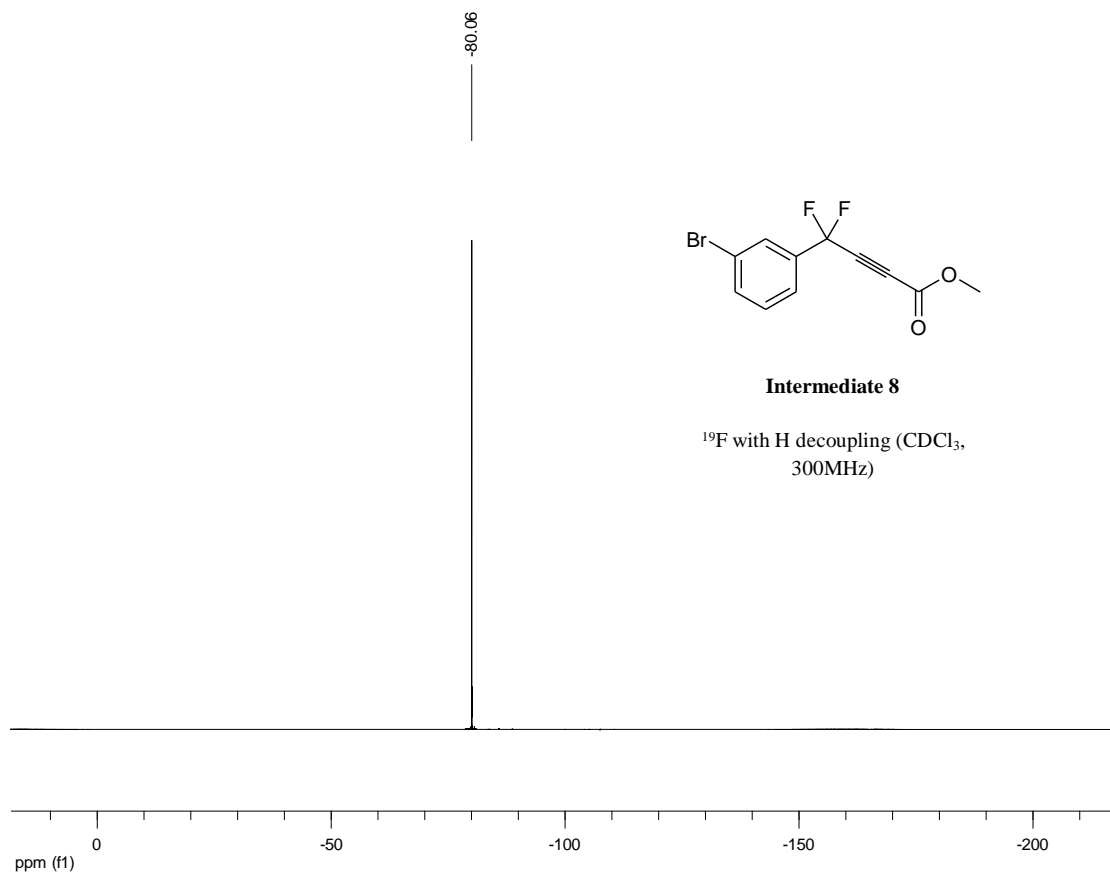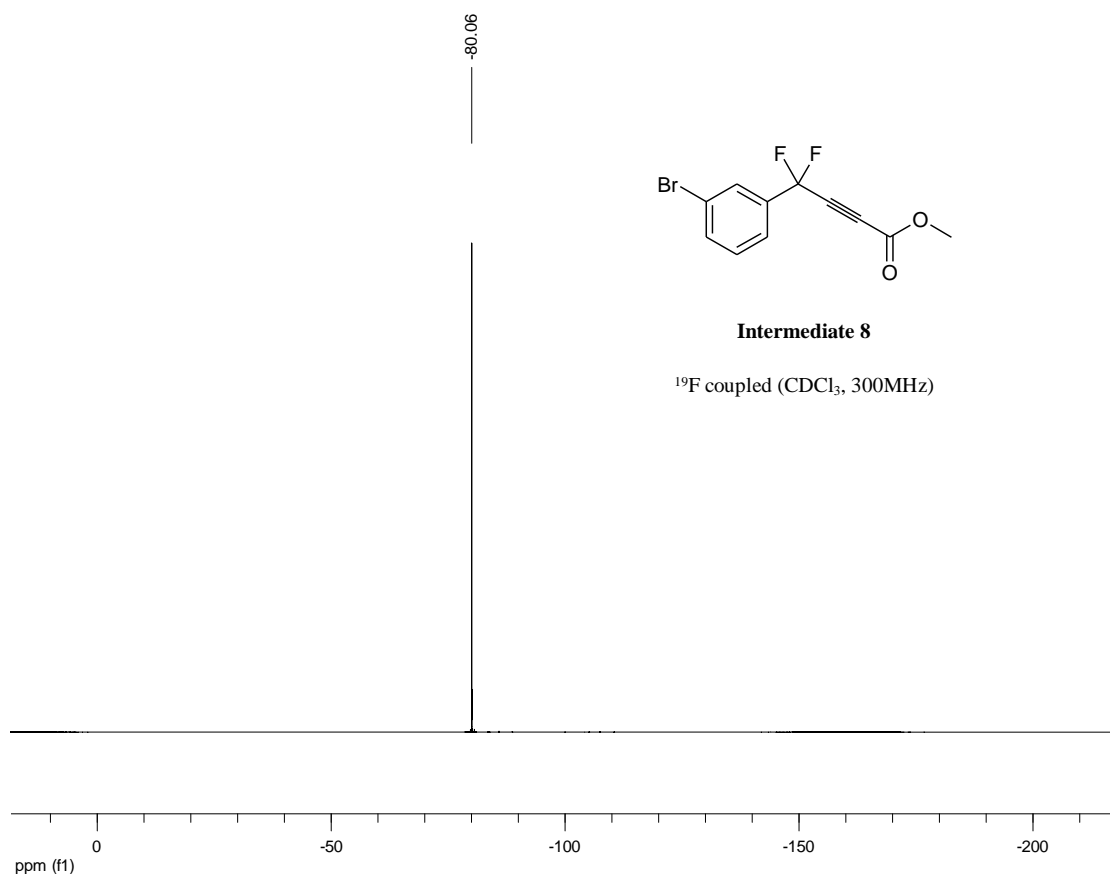

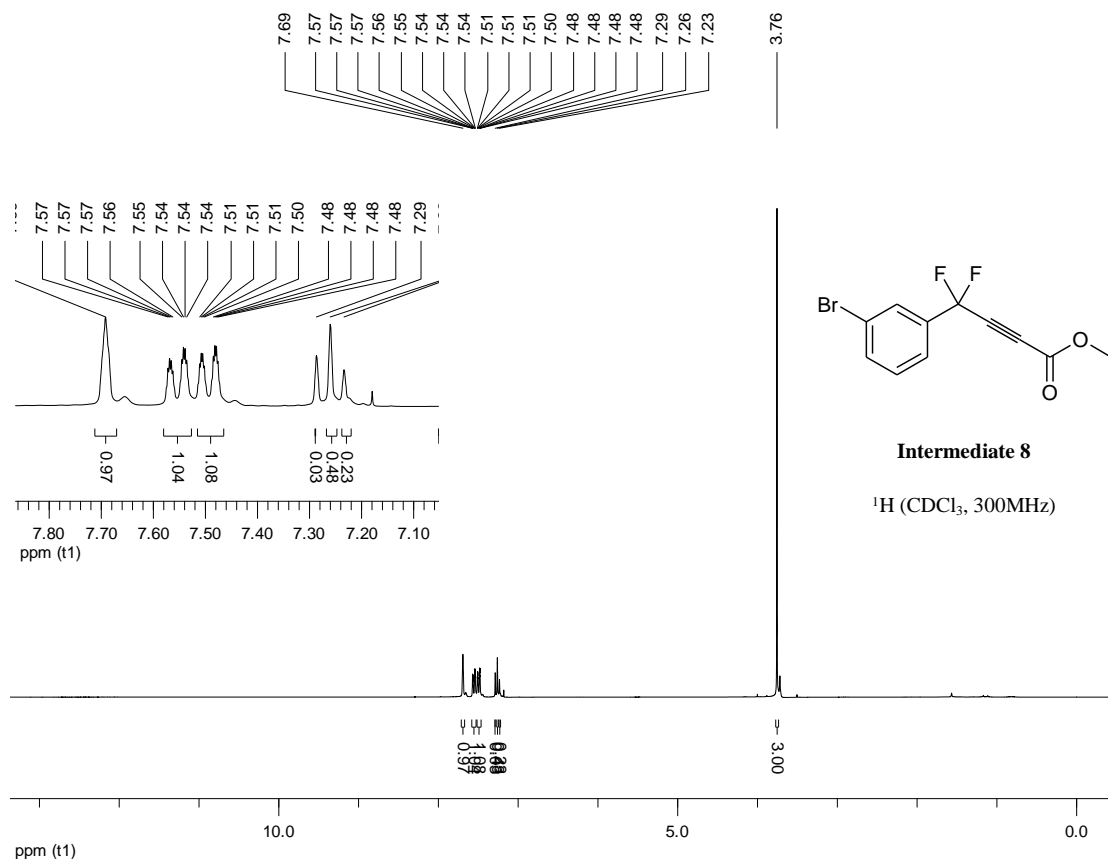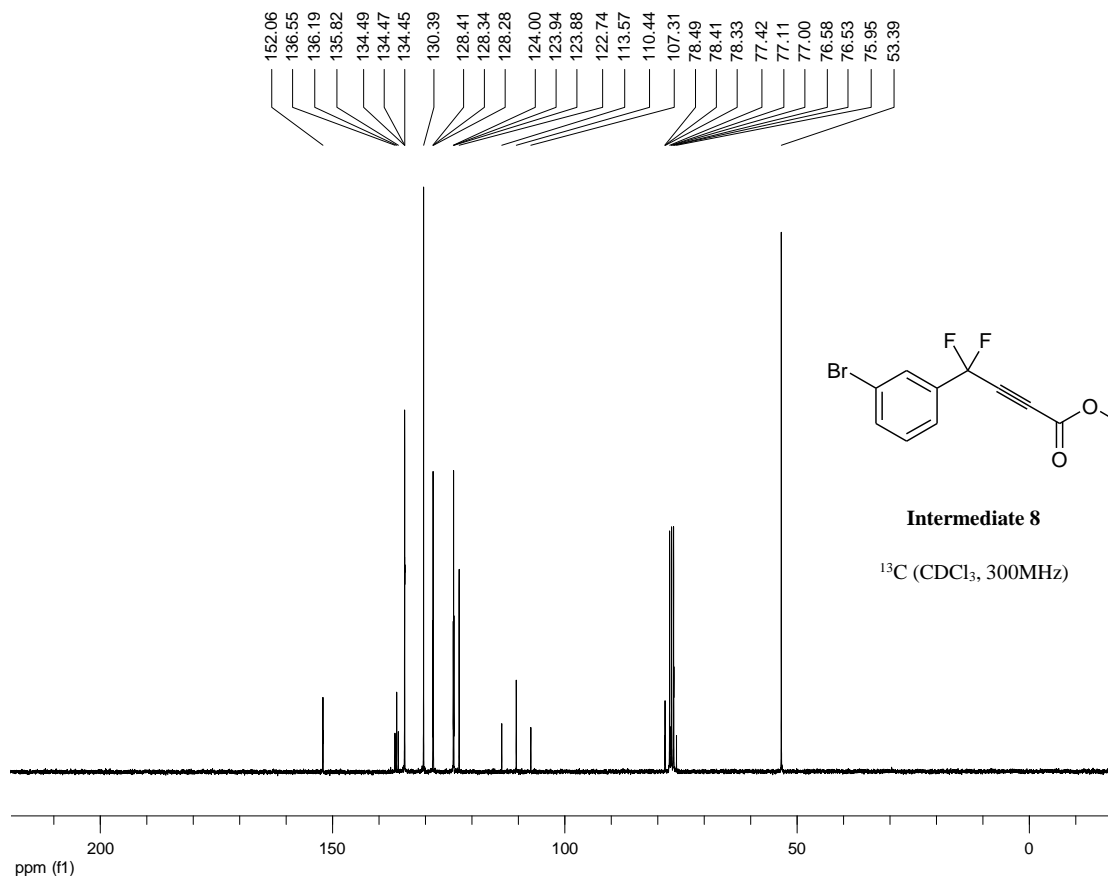

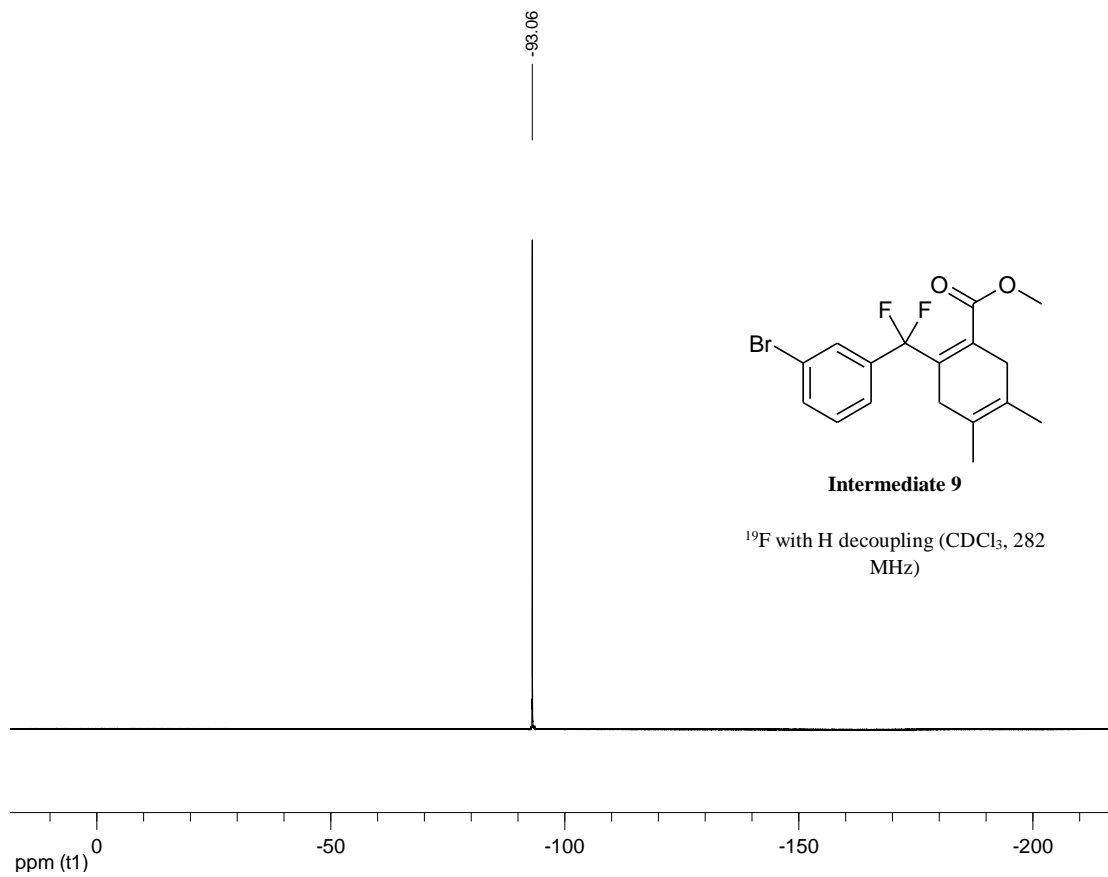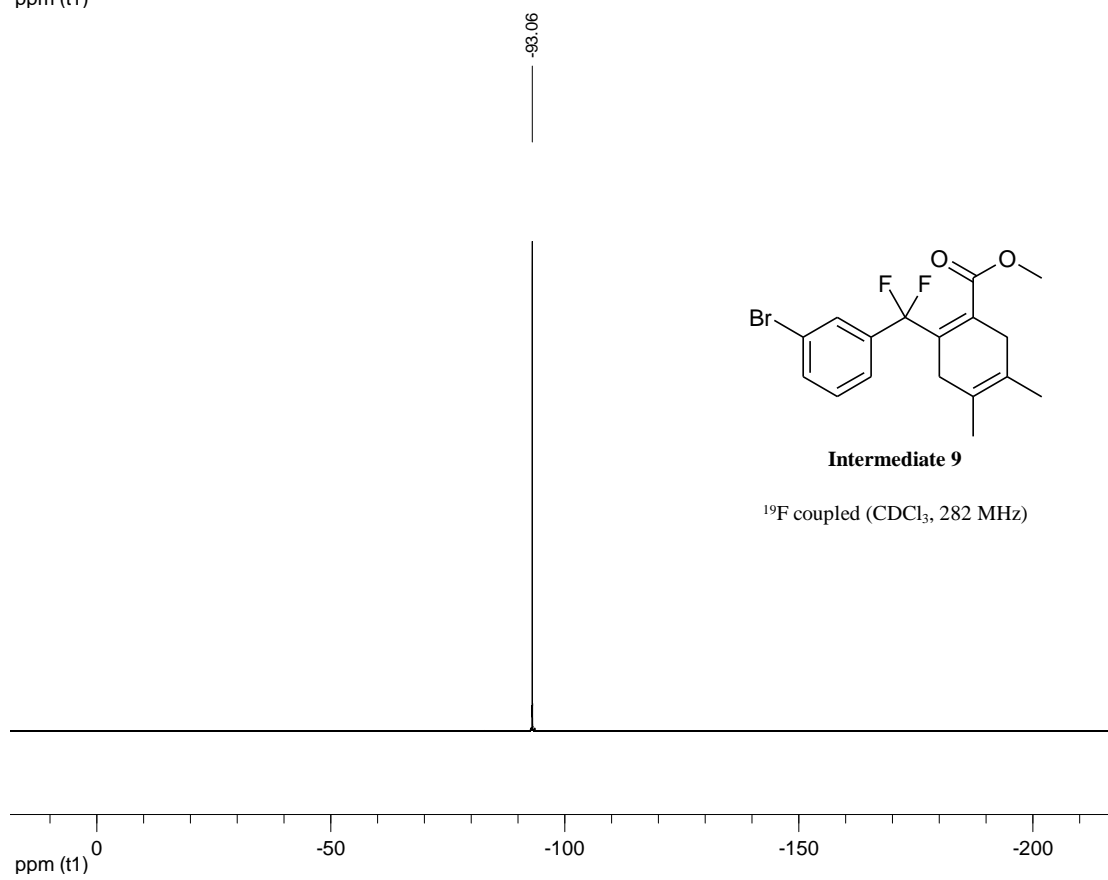



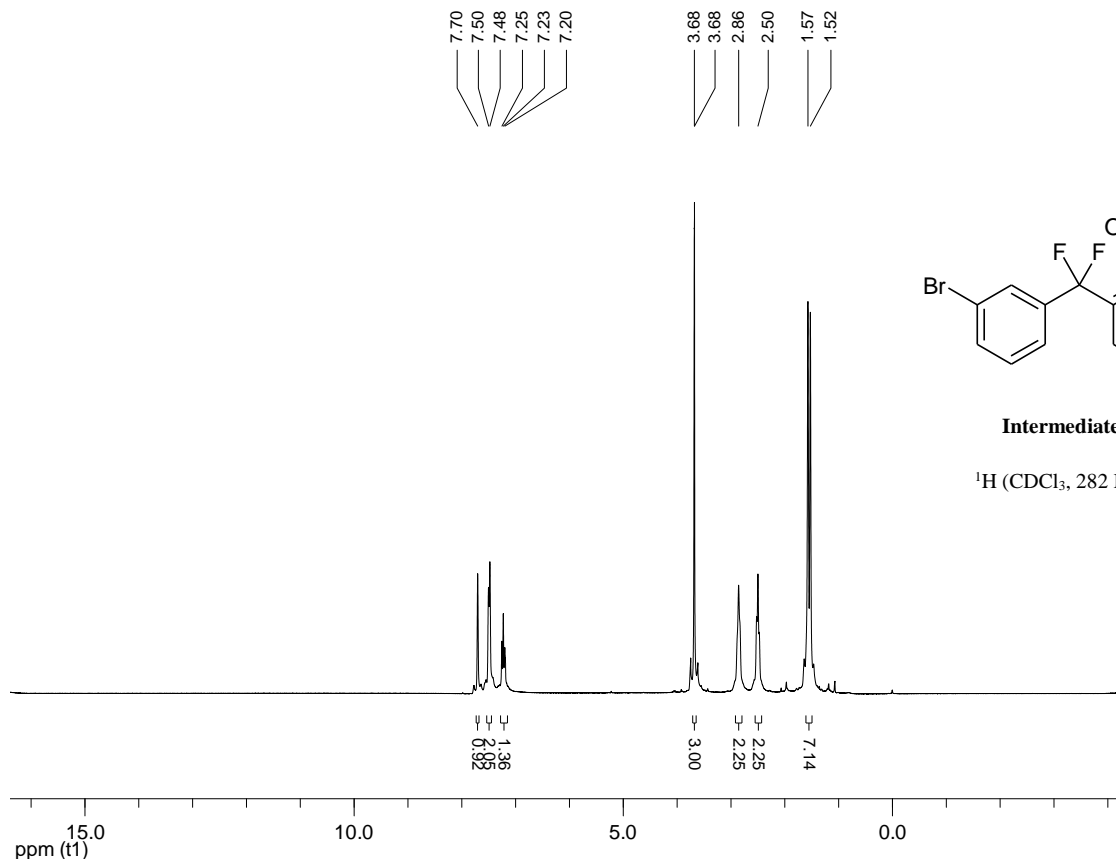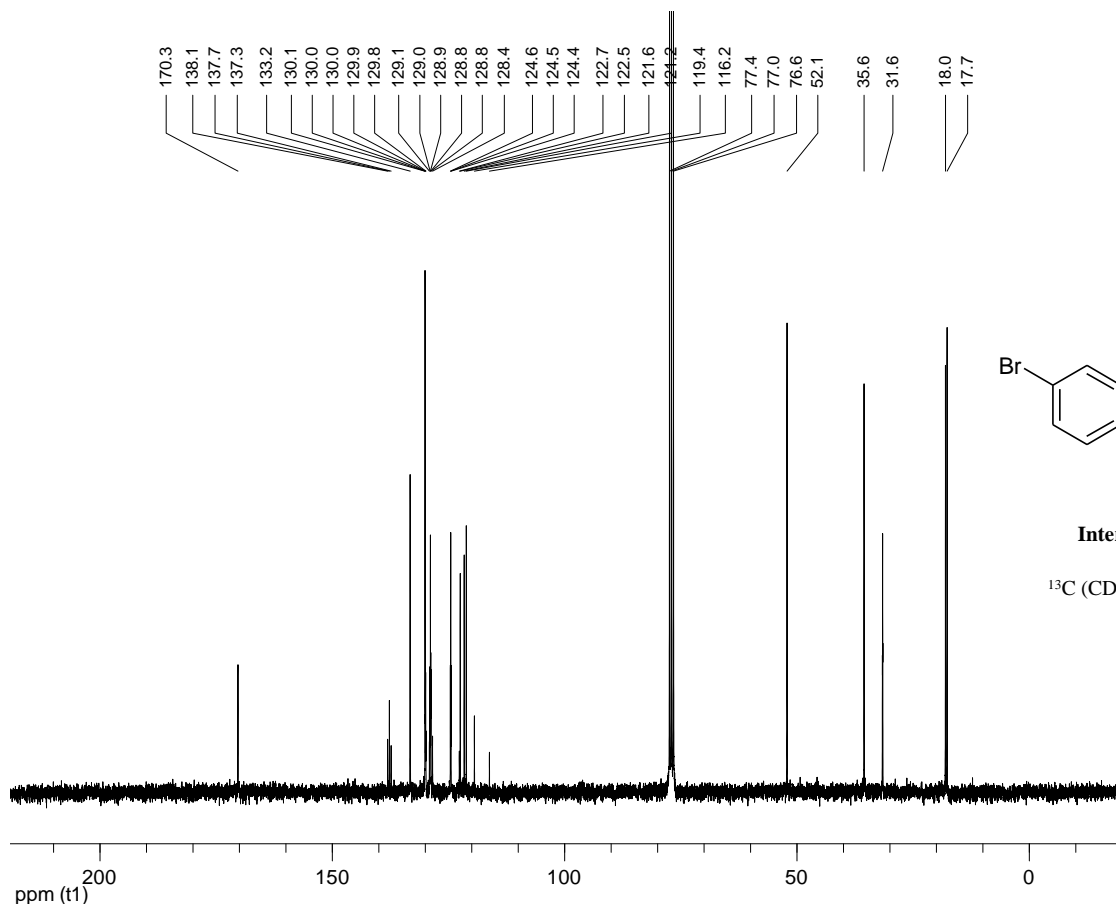

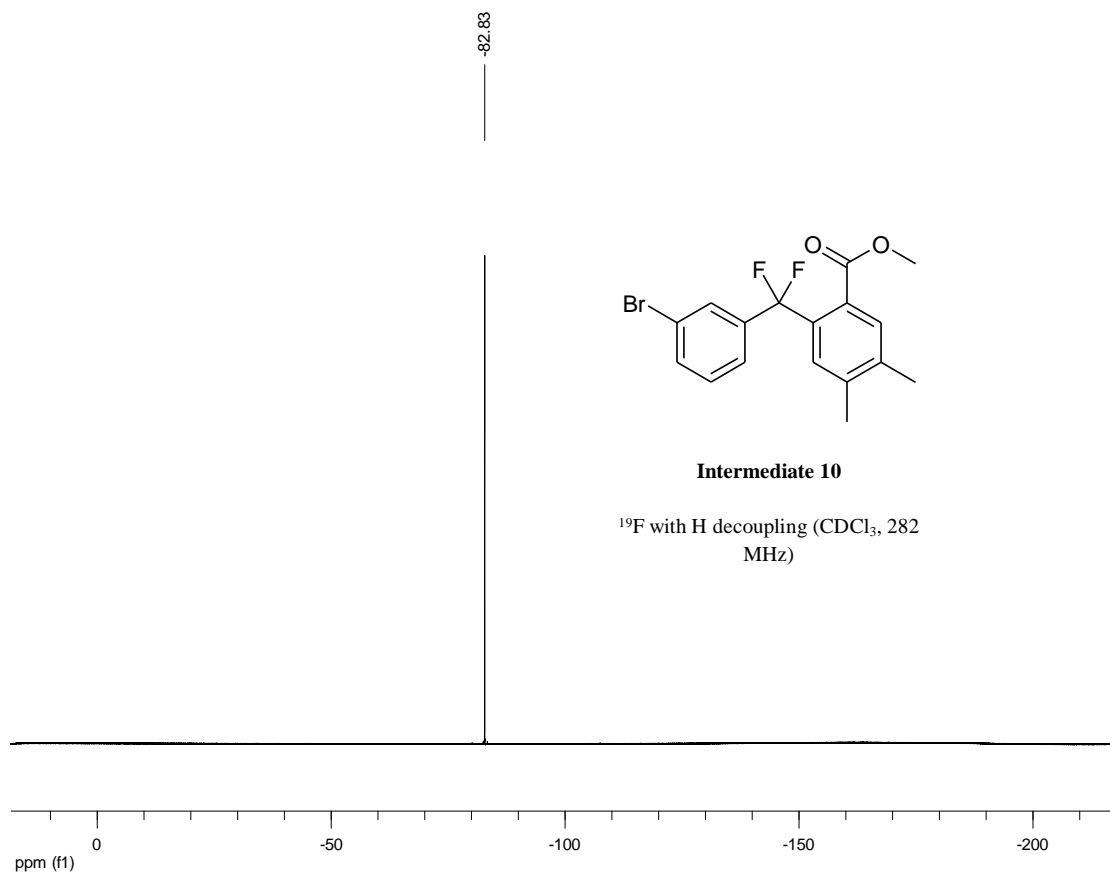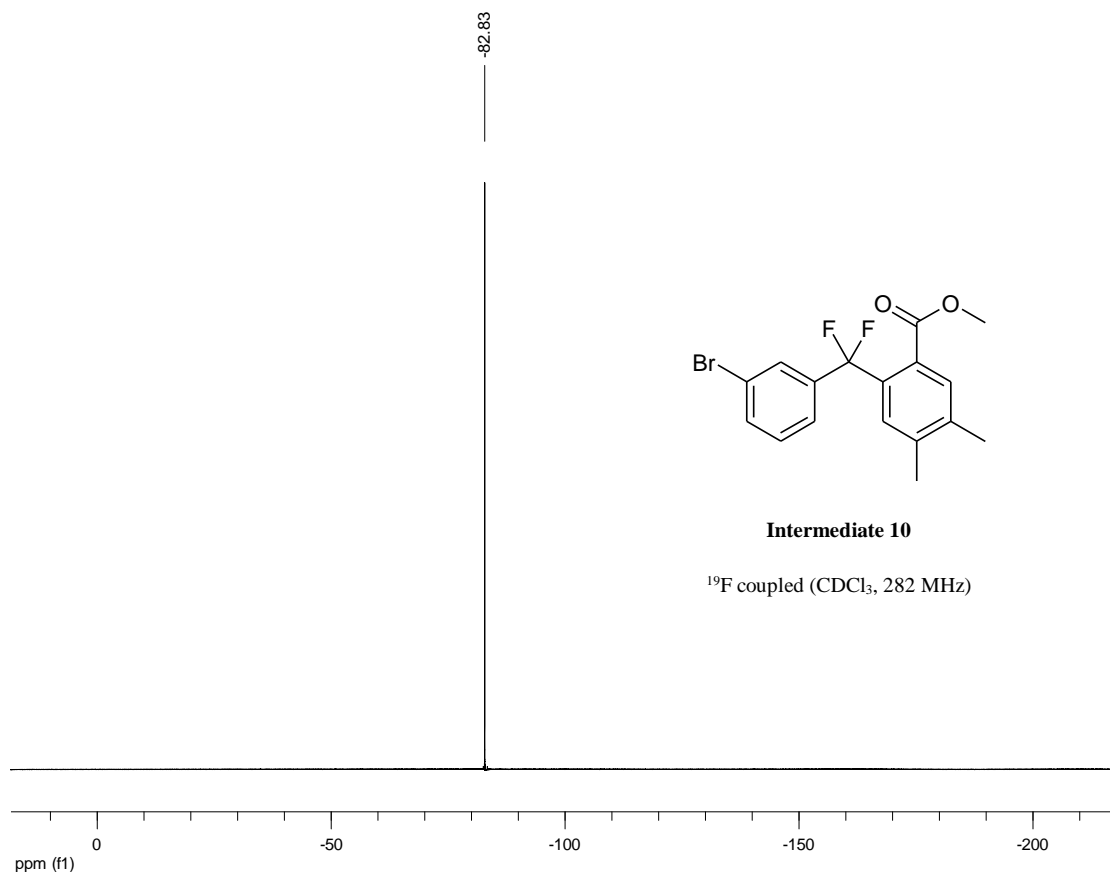

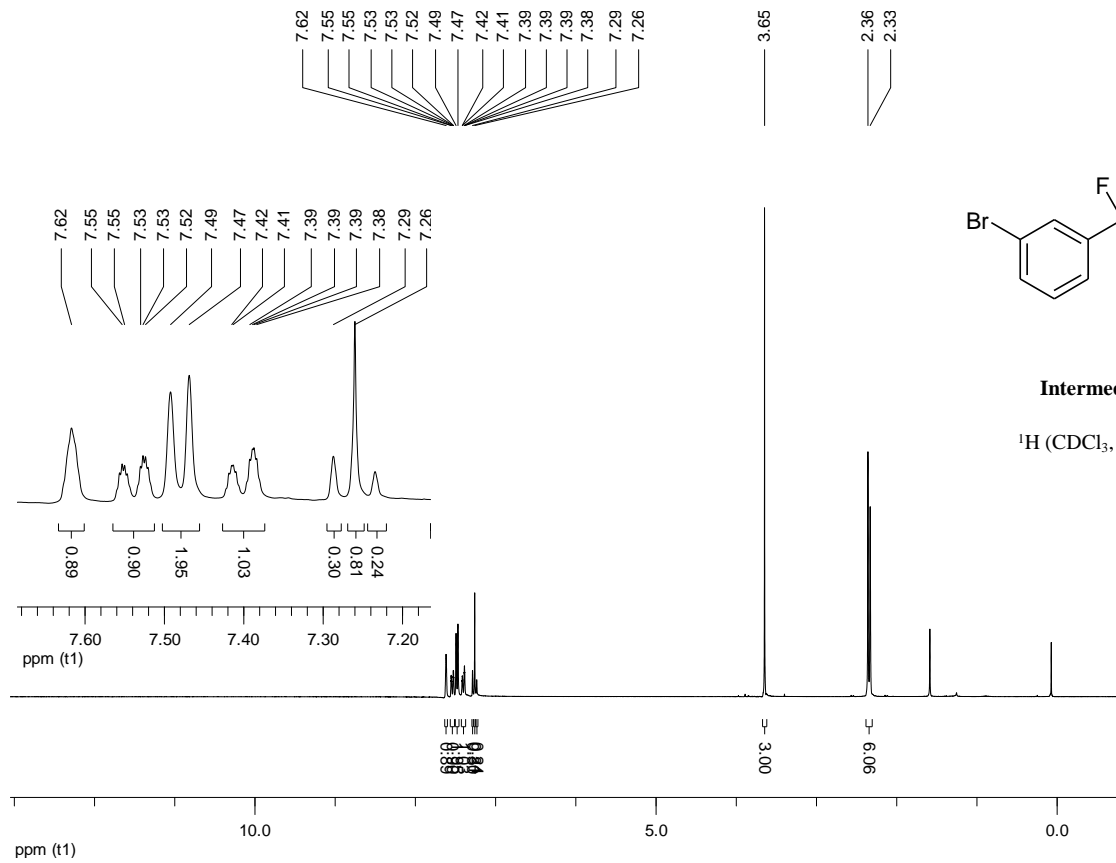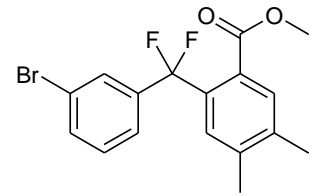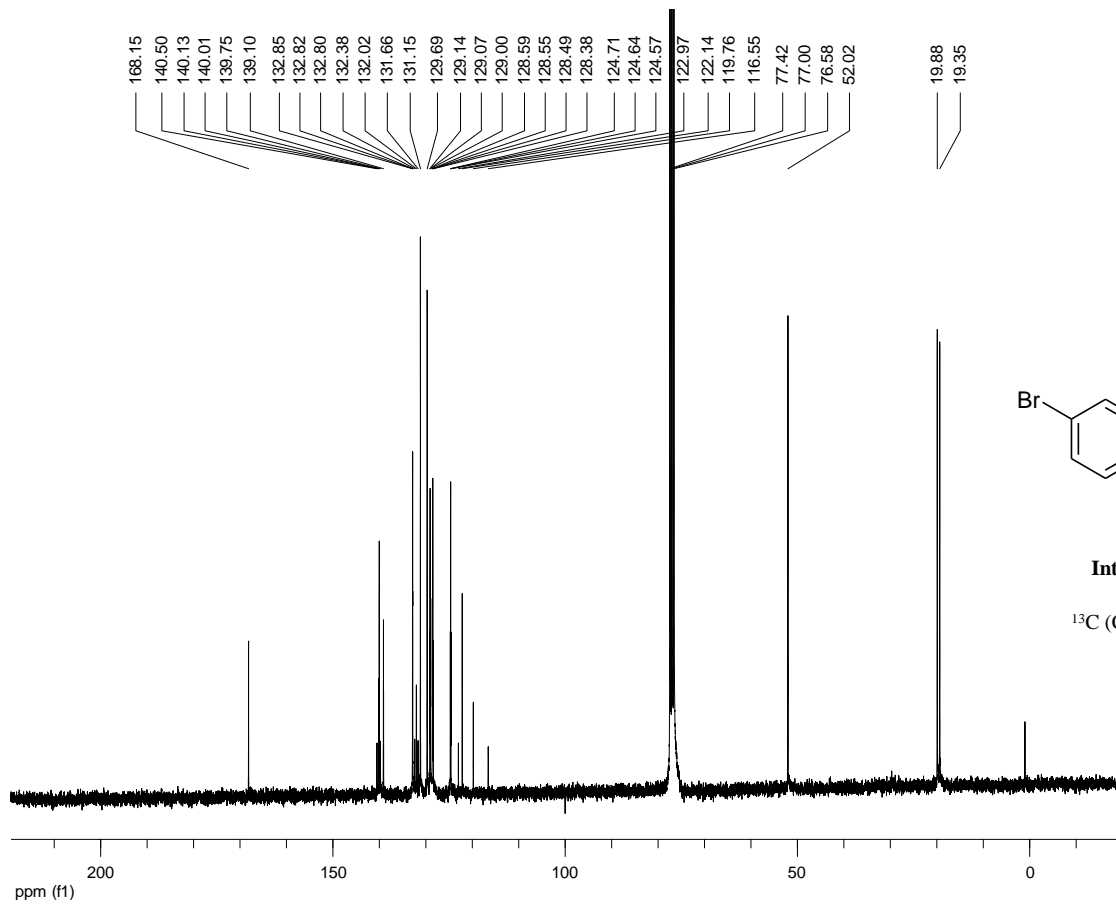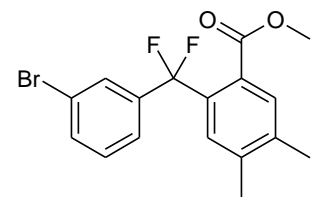

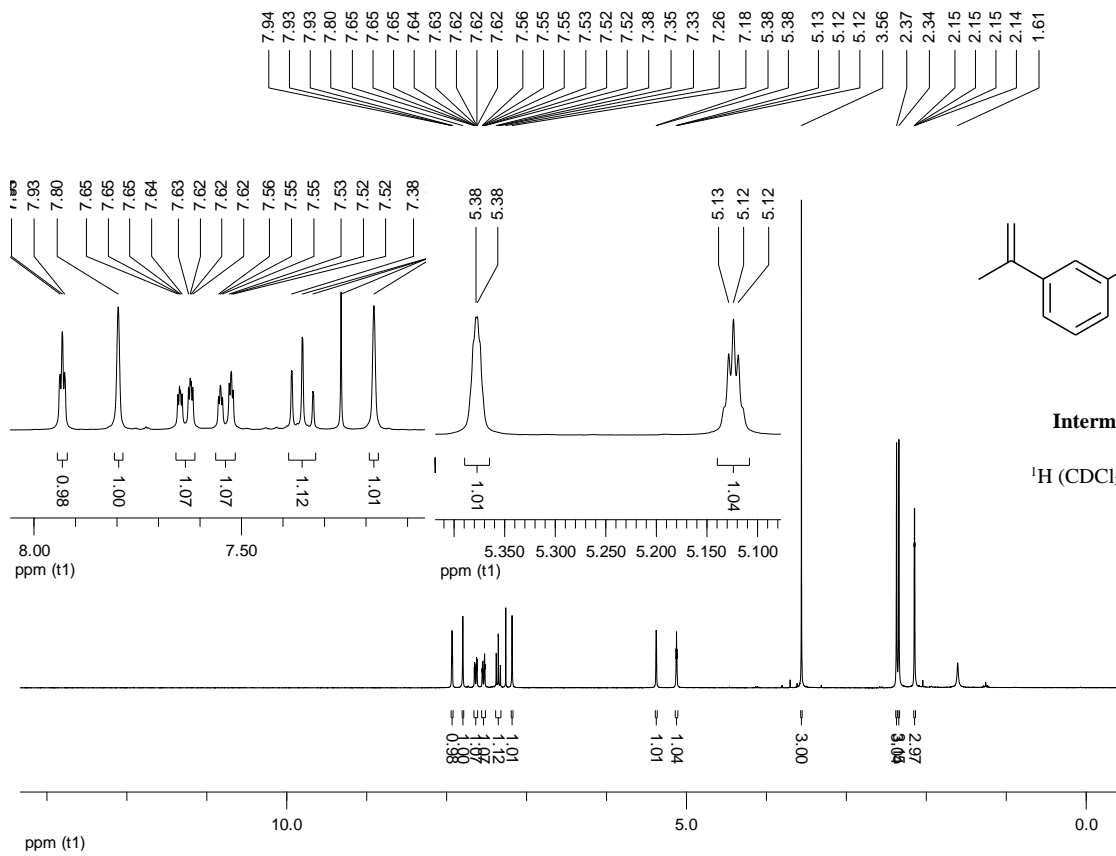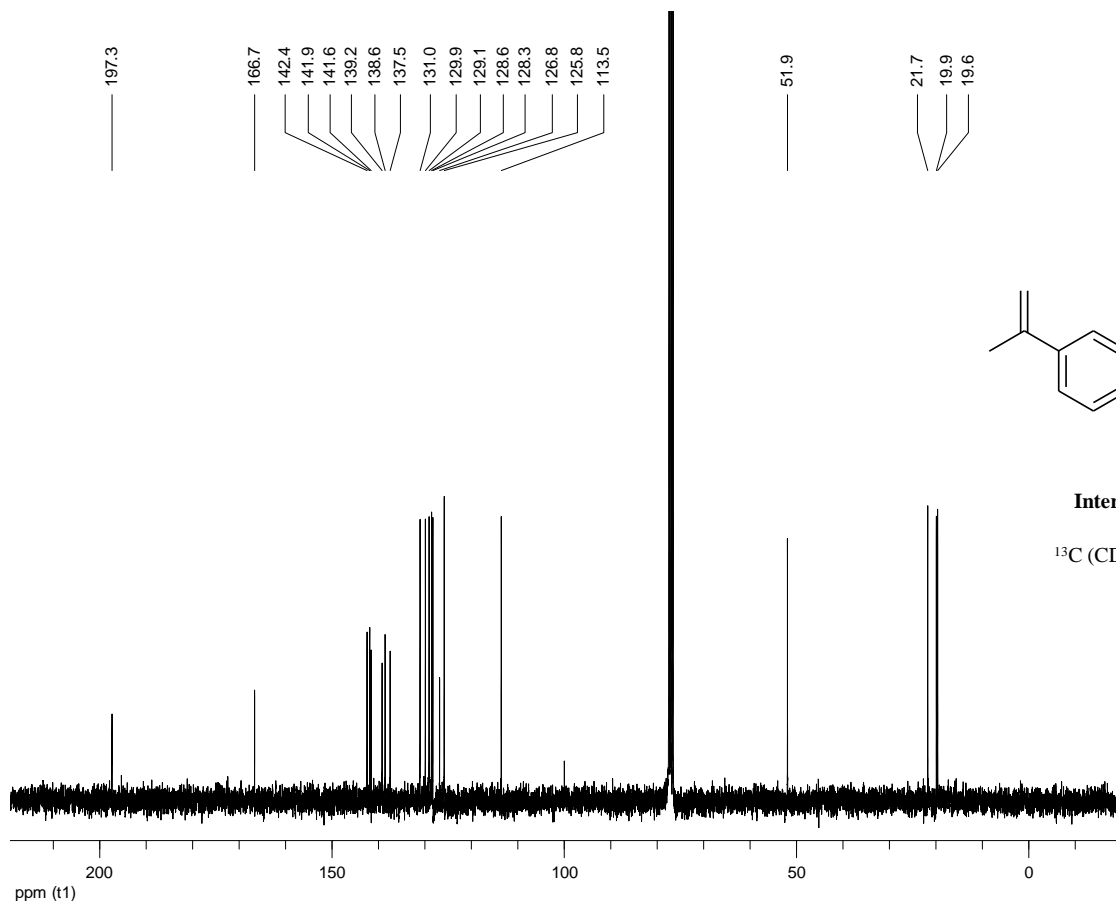

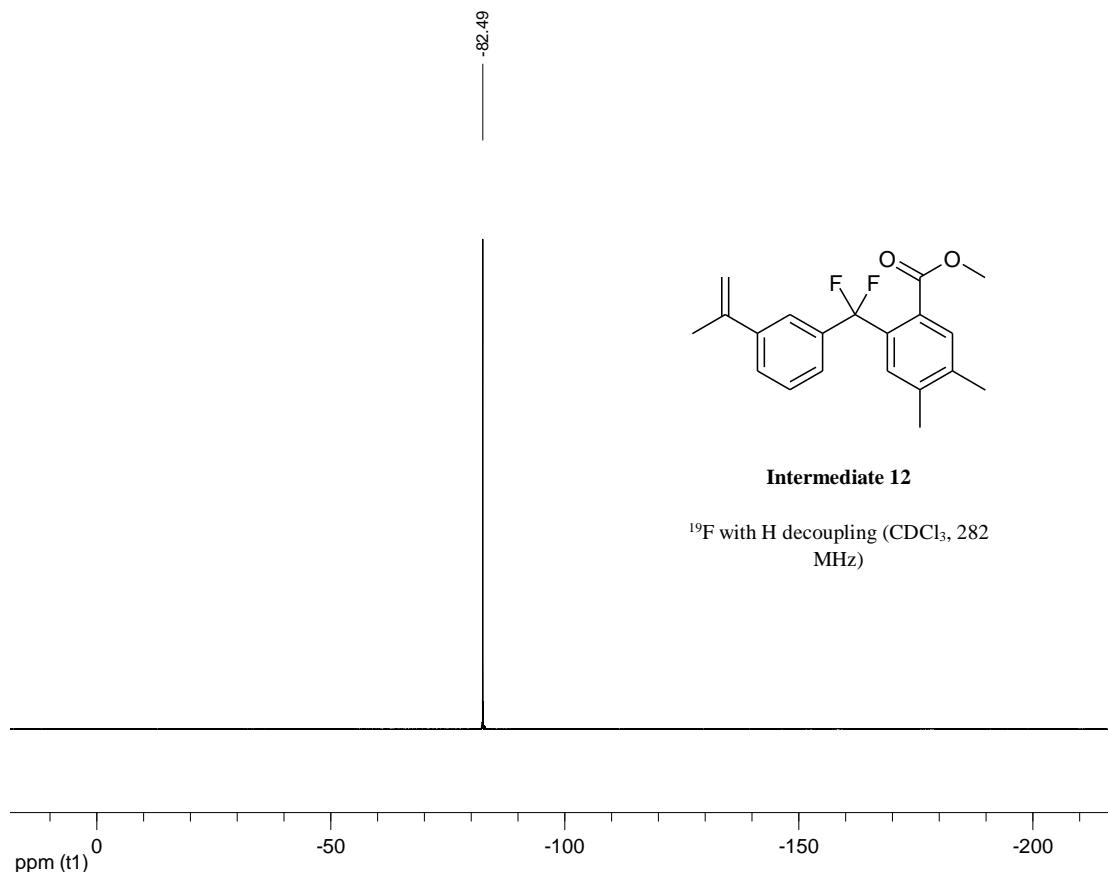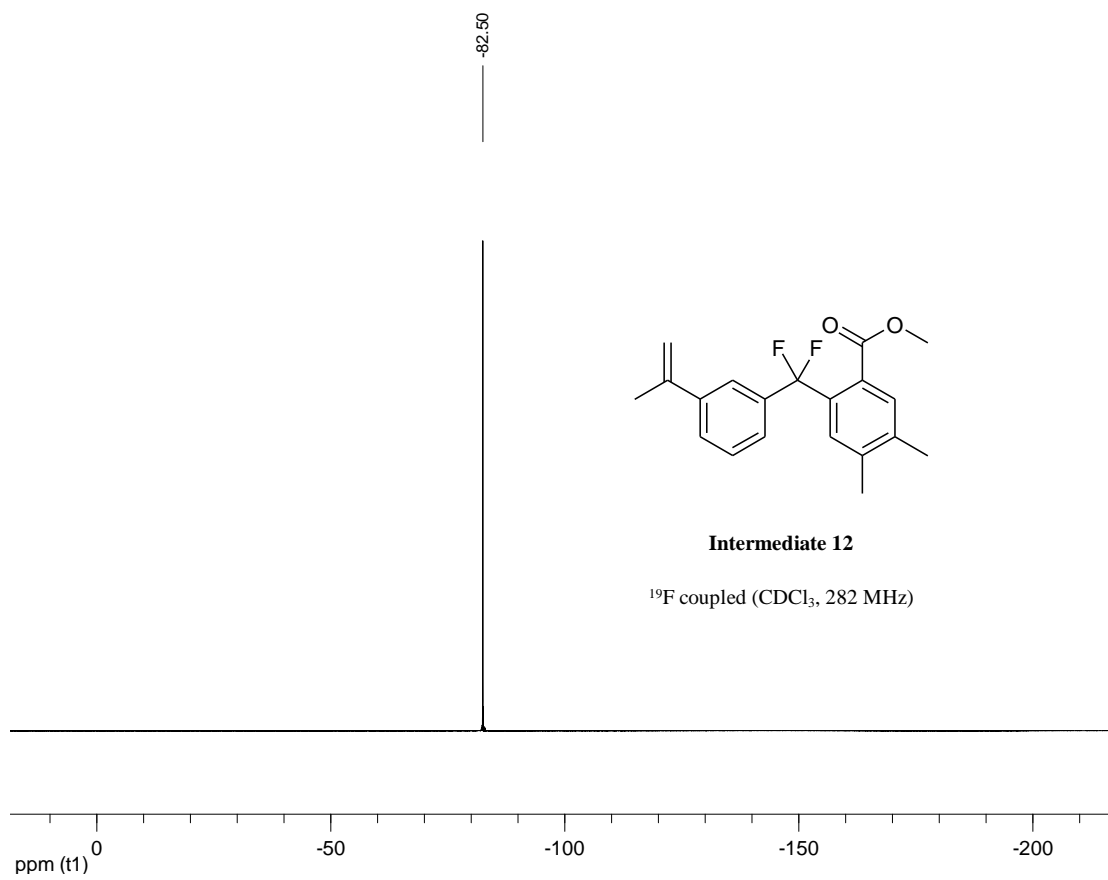

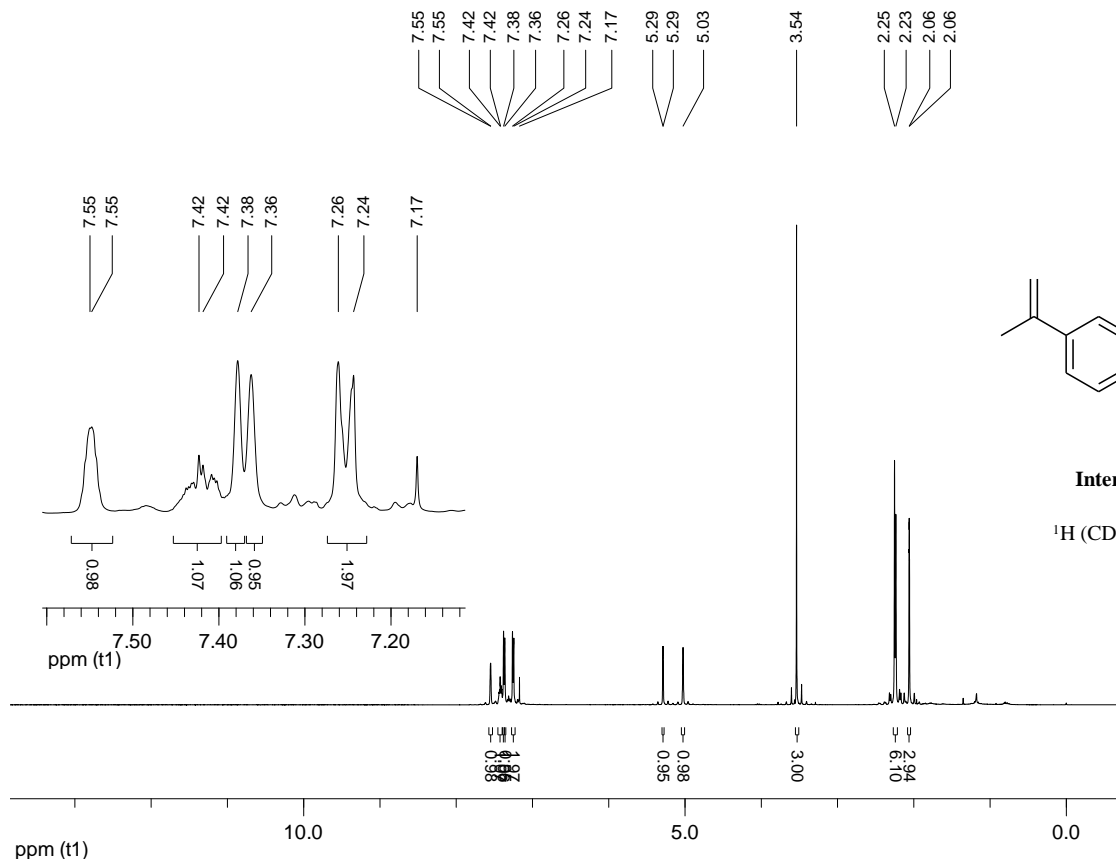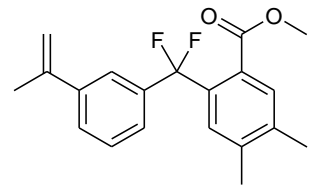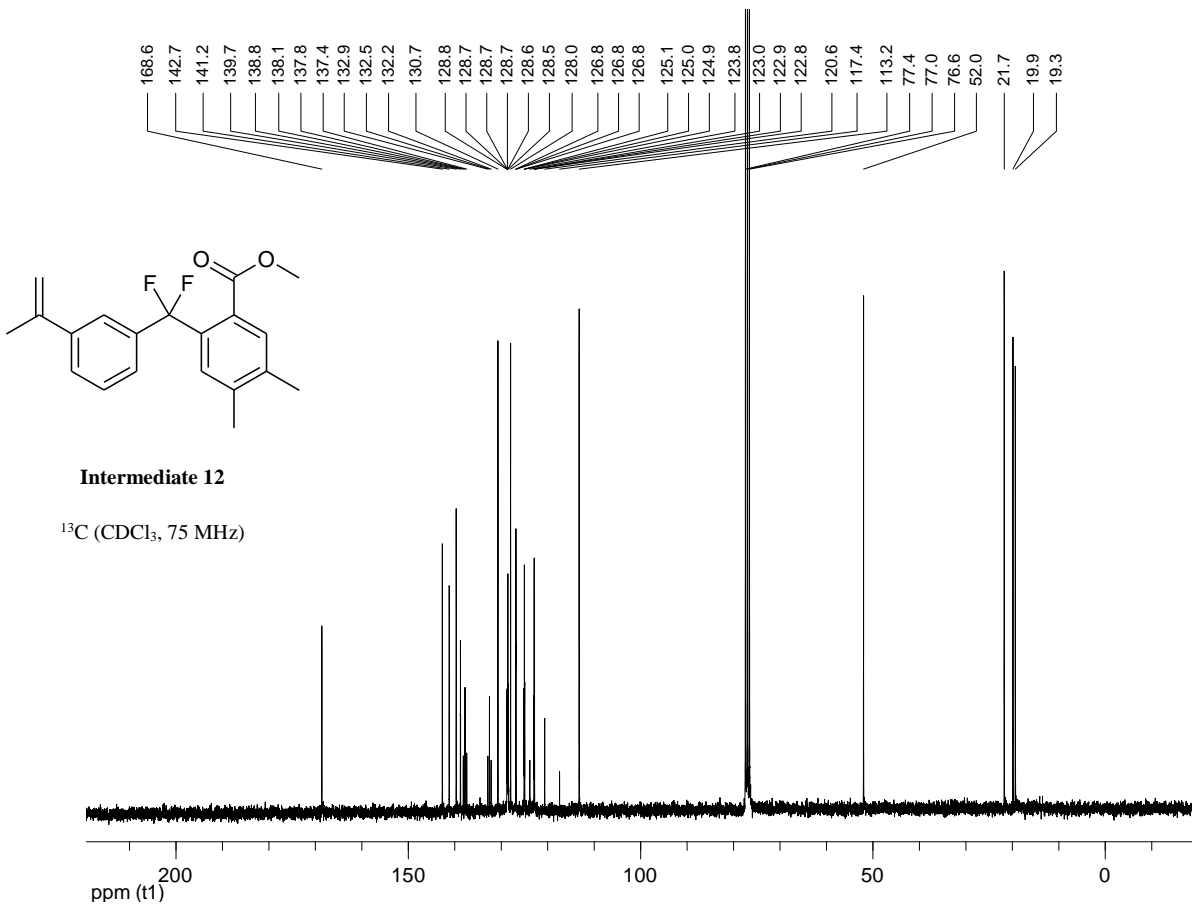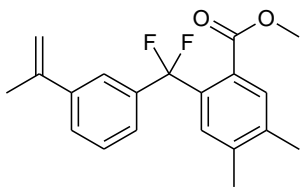

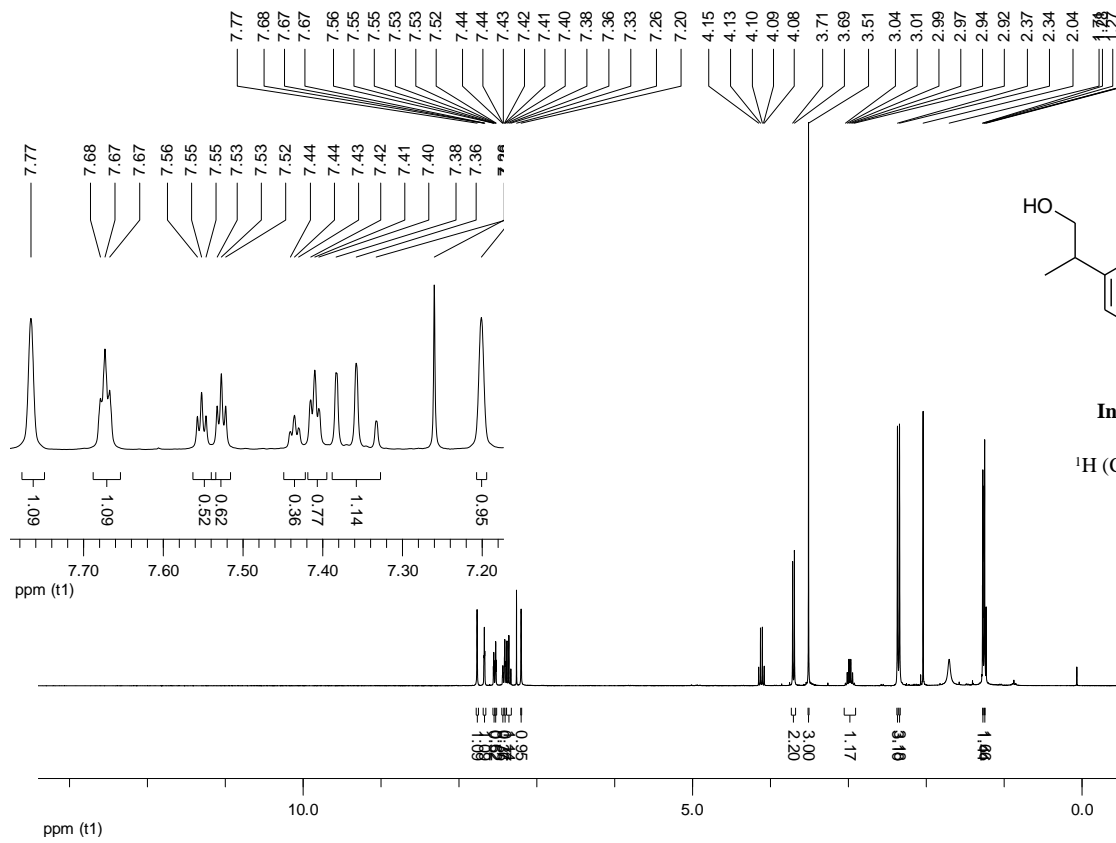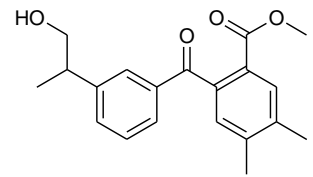

**Intermediate 13**

<sup>1</sup>H (CDCl<sub>3</sub>, 300 MHz)

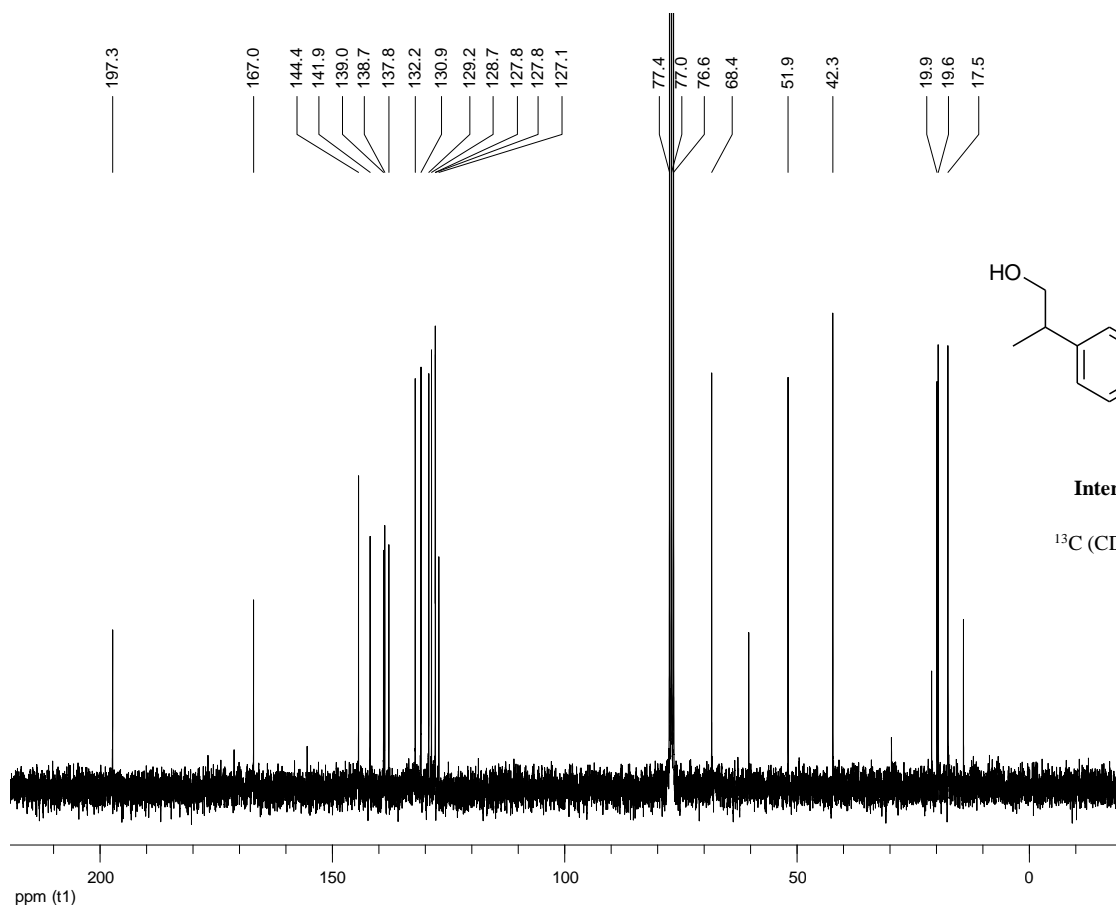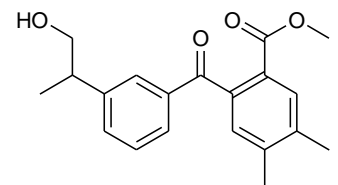

**Intermediate 13**

<sup>13</sup>C (CDCl<sub>3</sub>, 75 MHz)

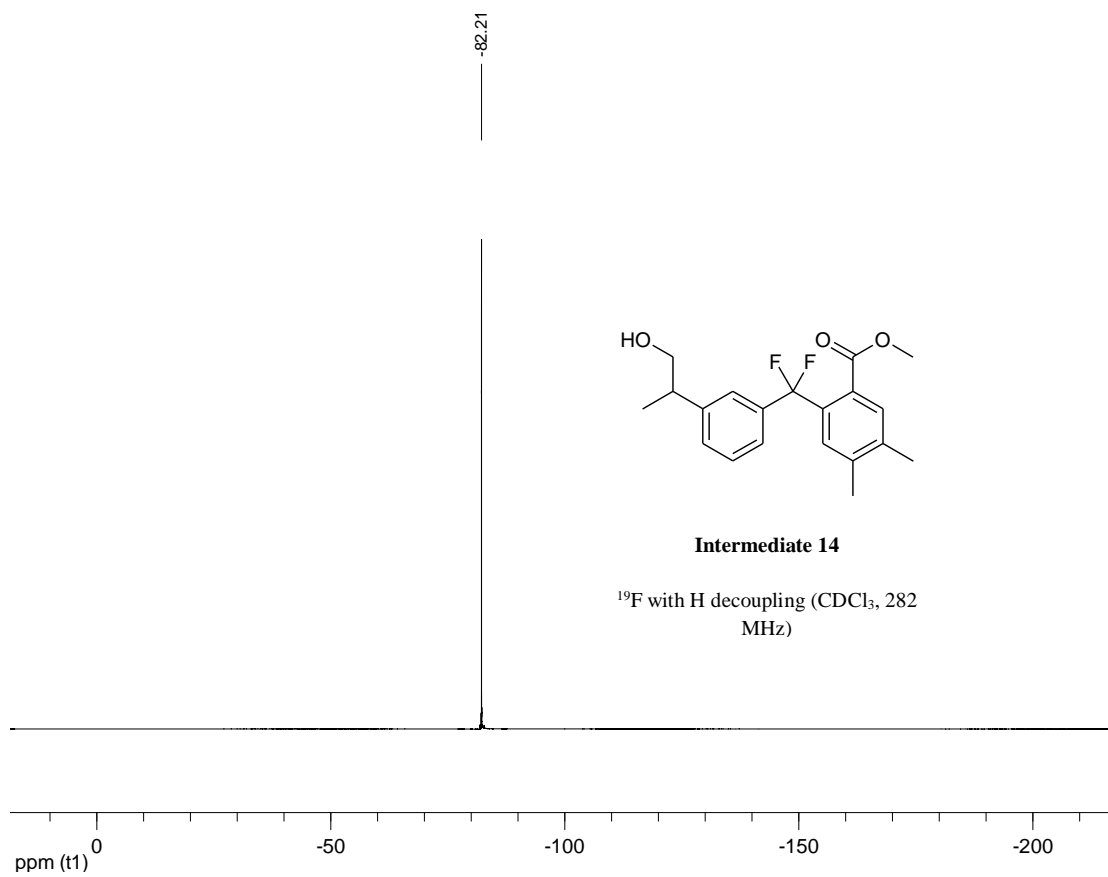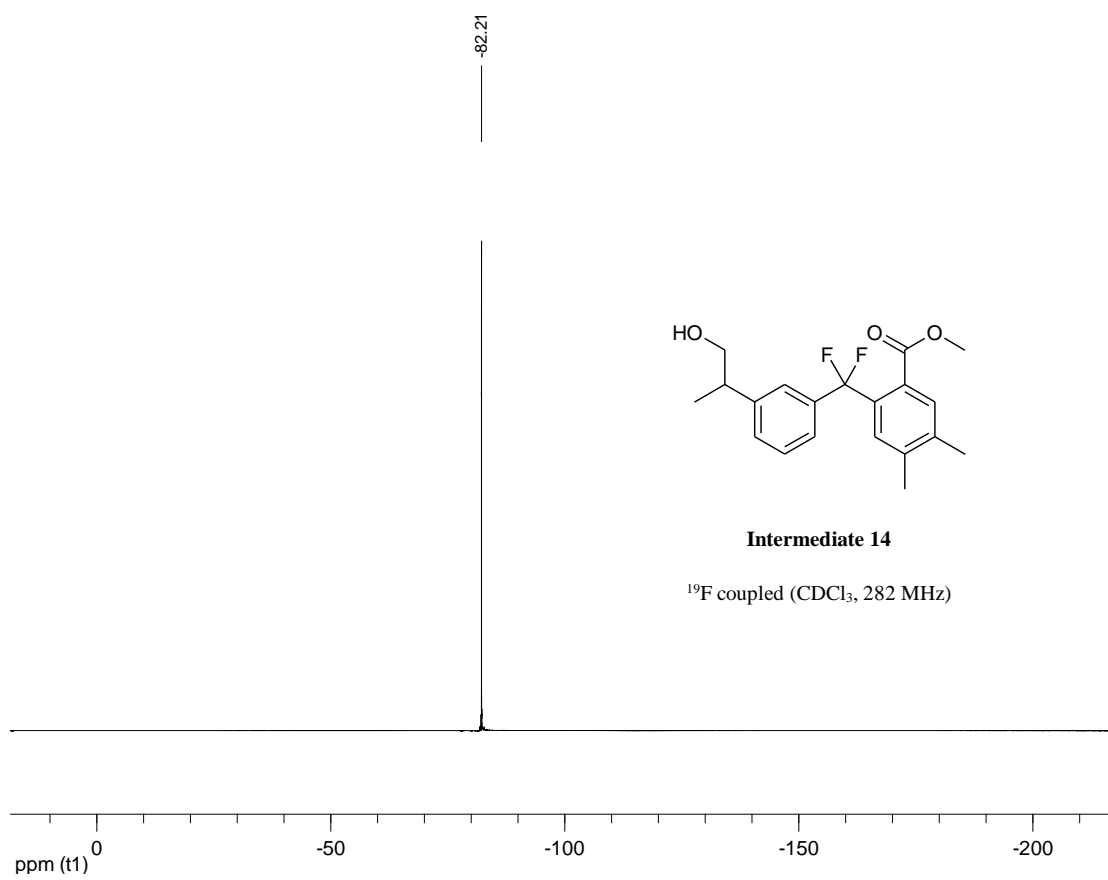



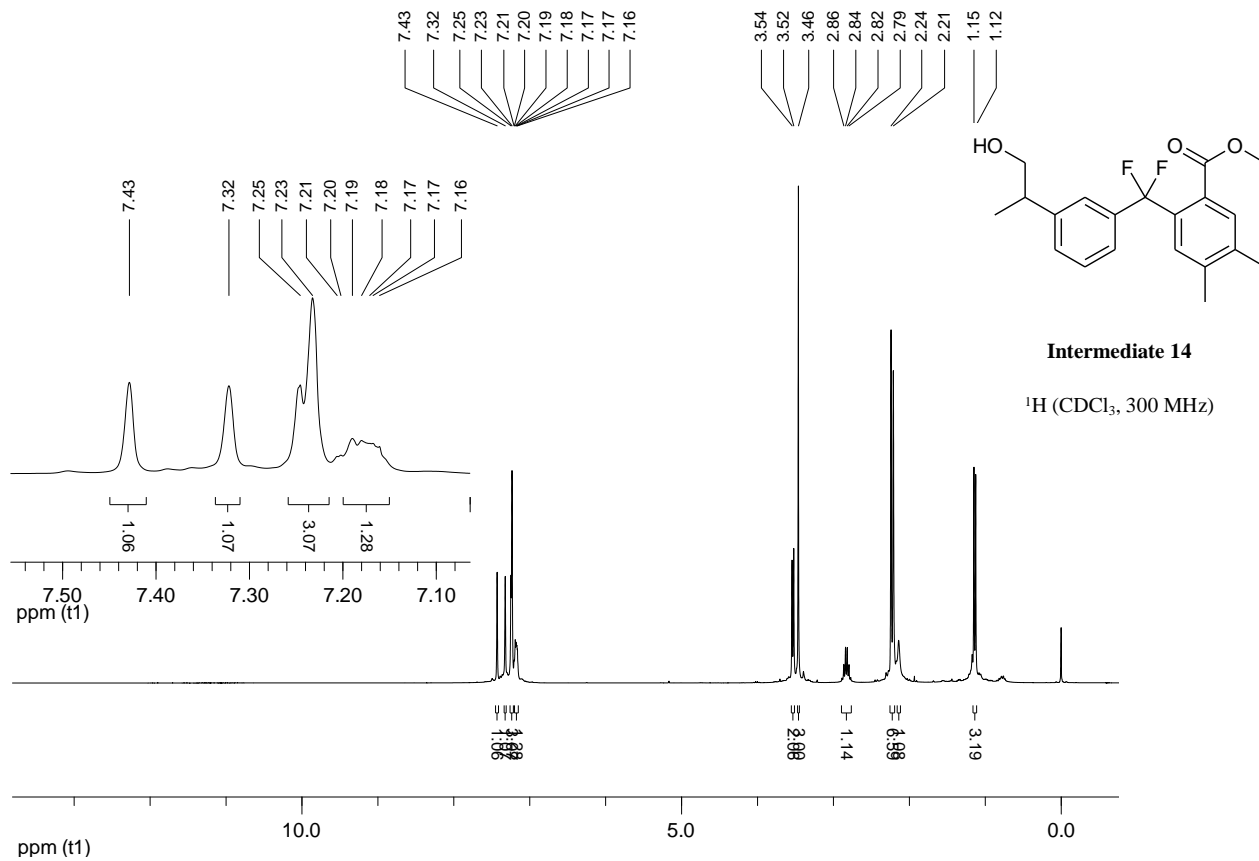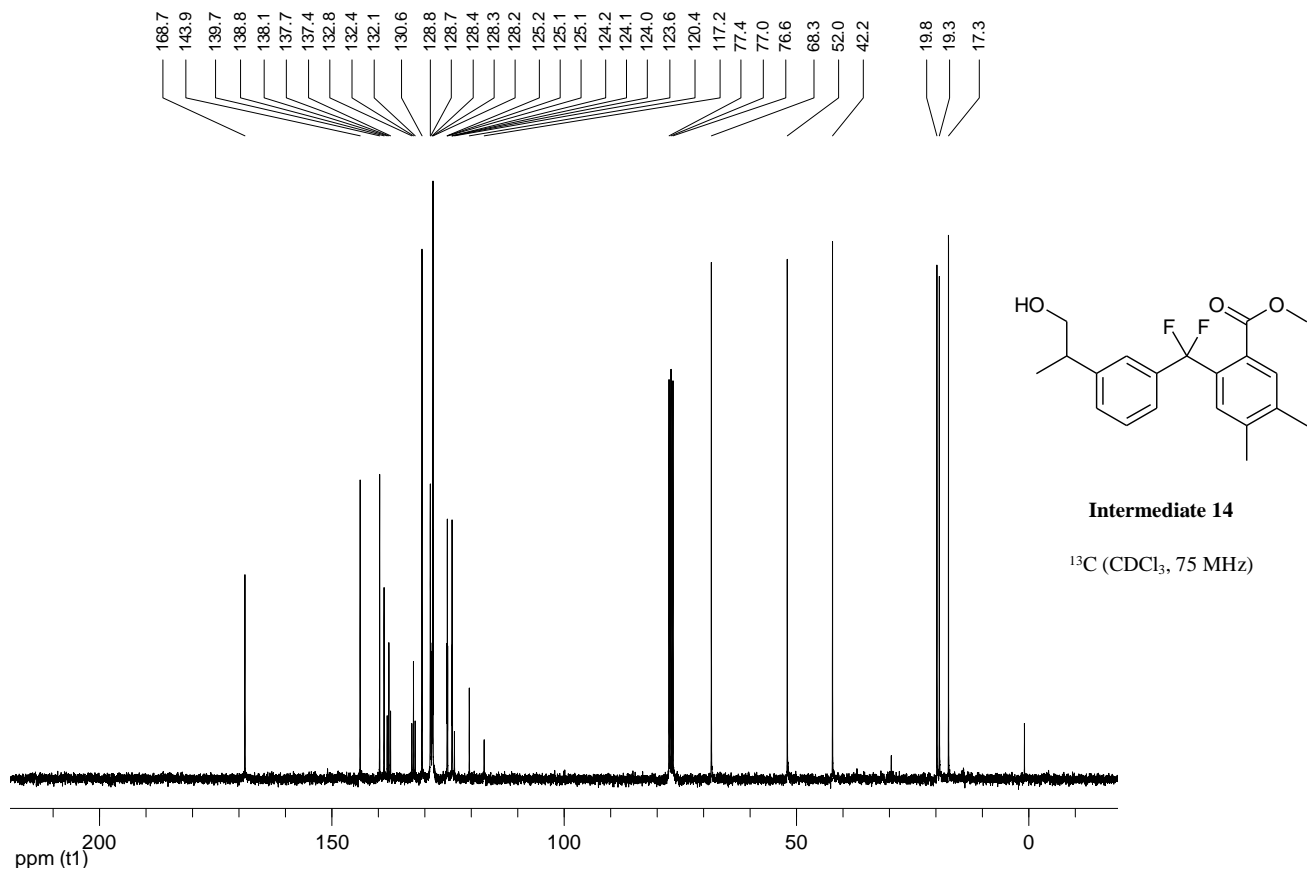

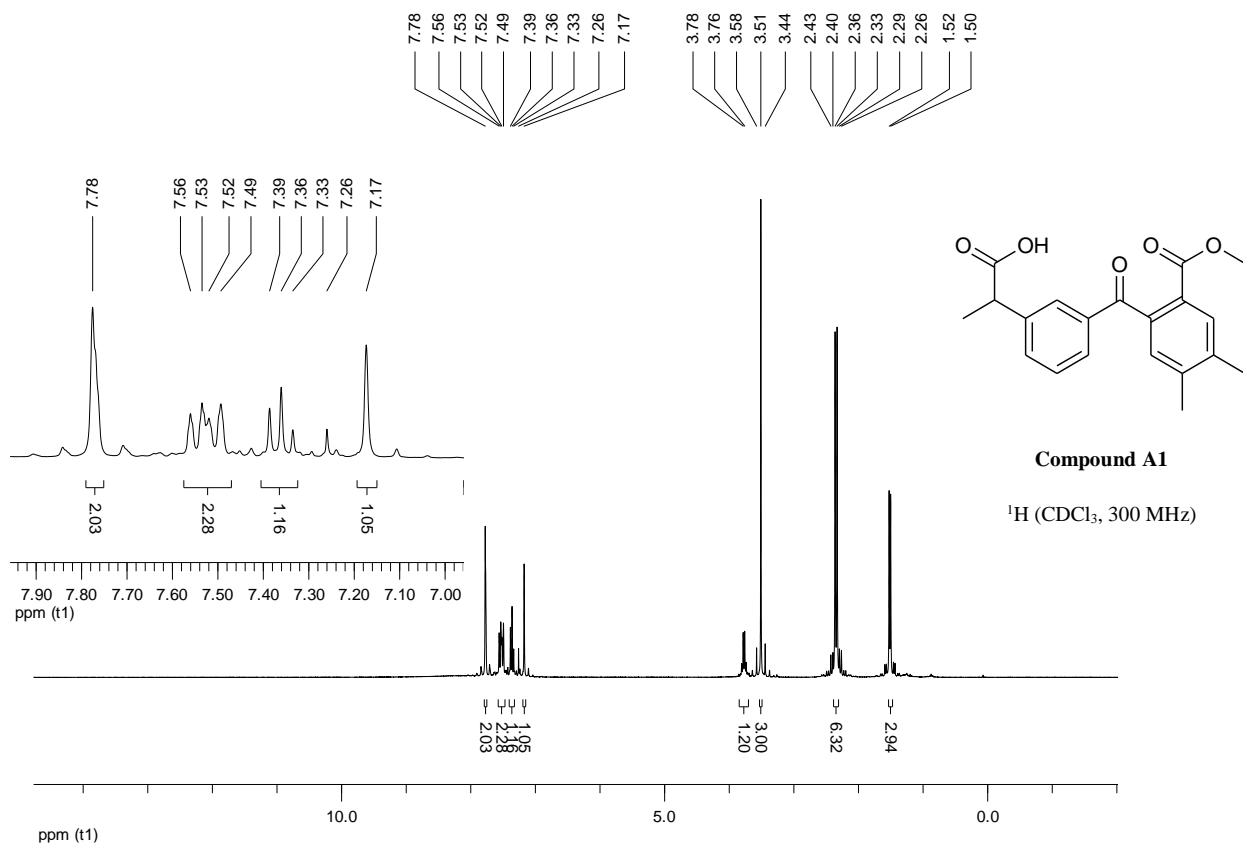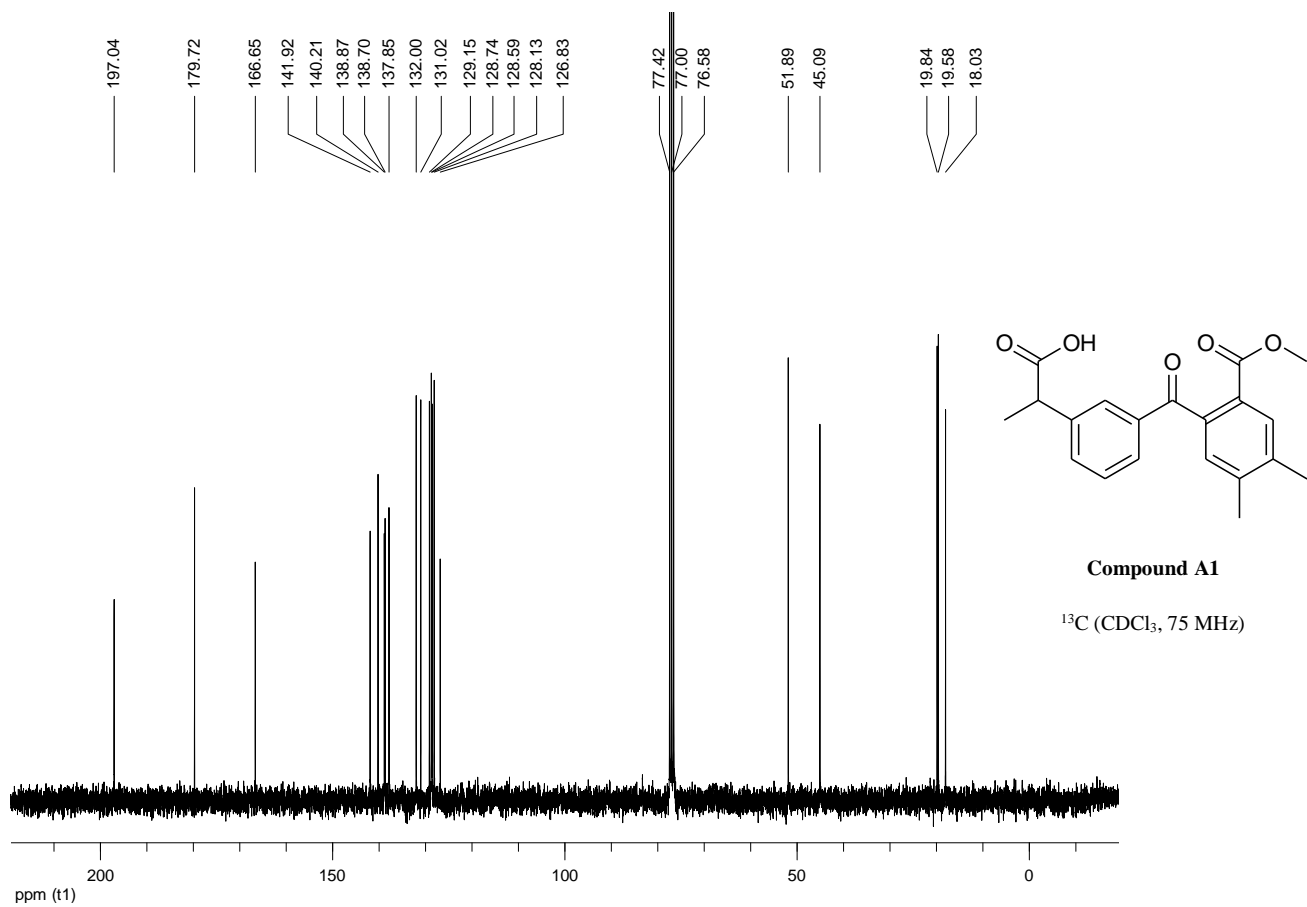

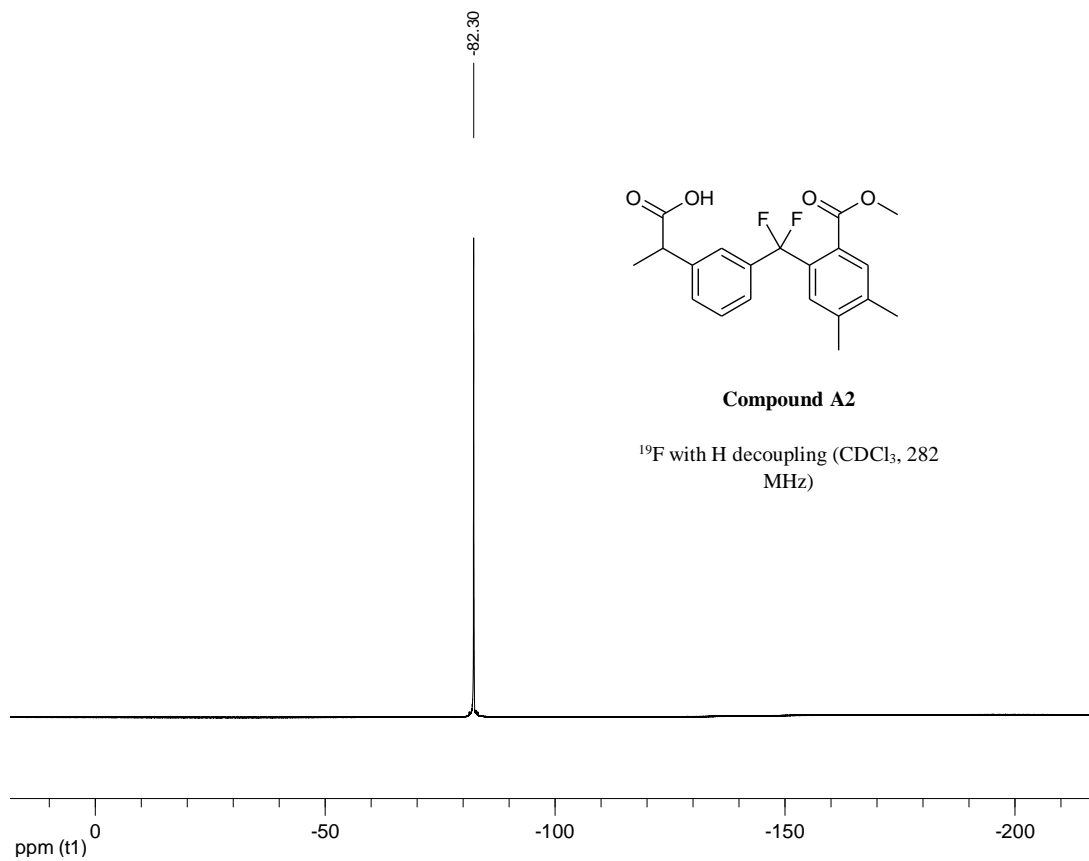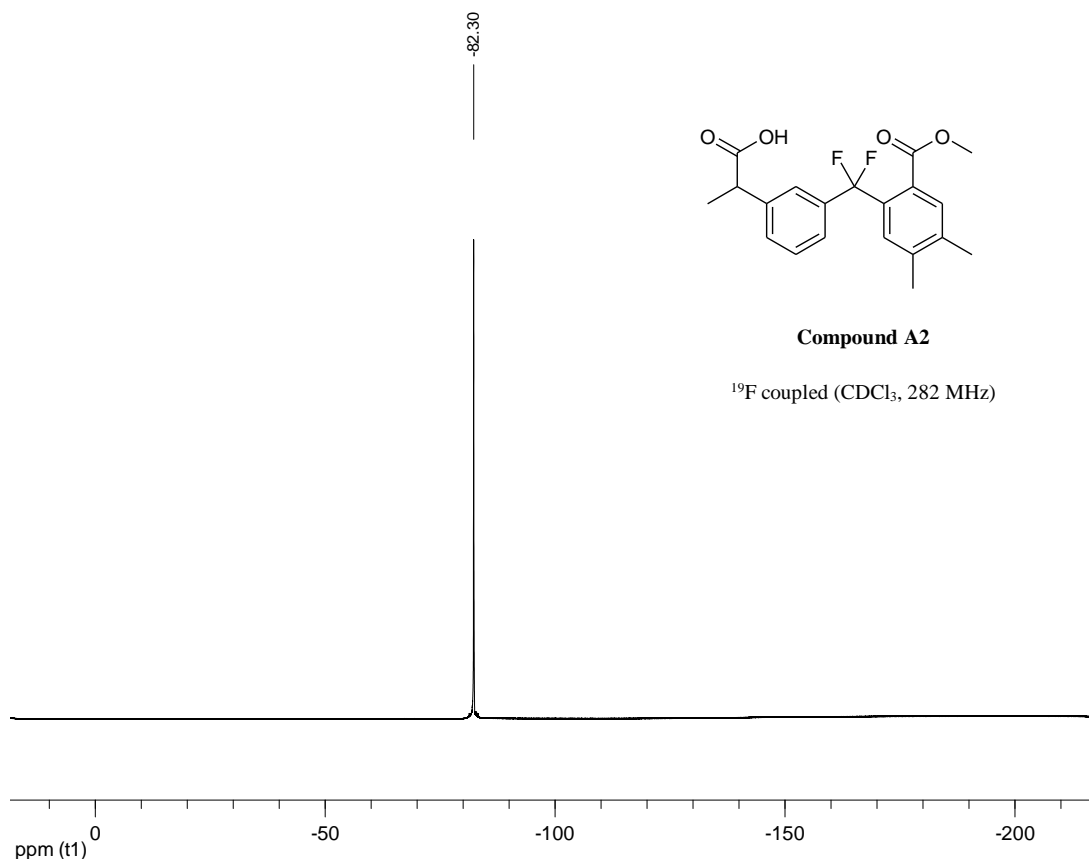

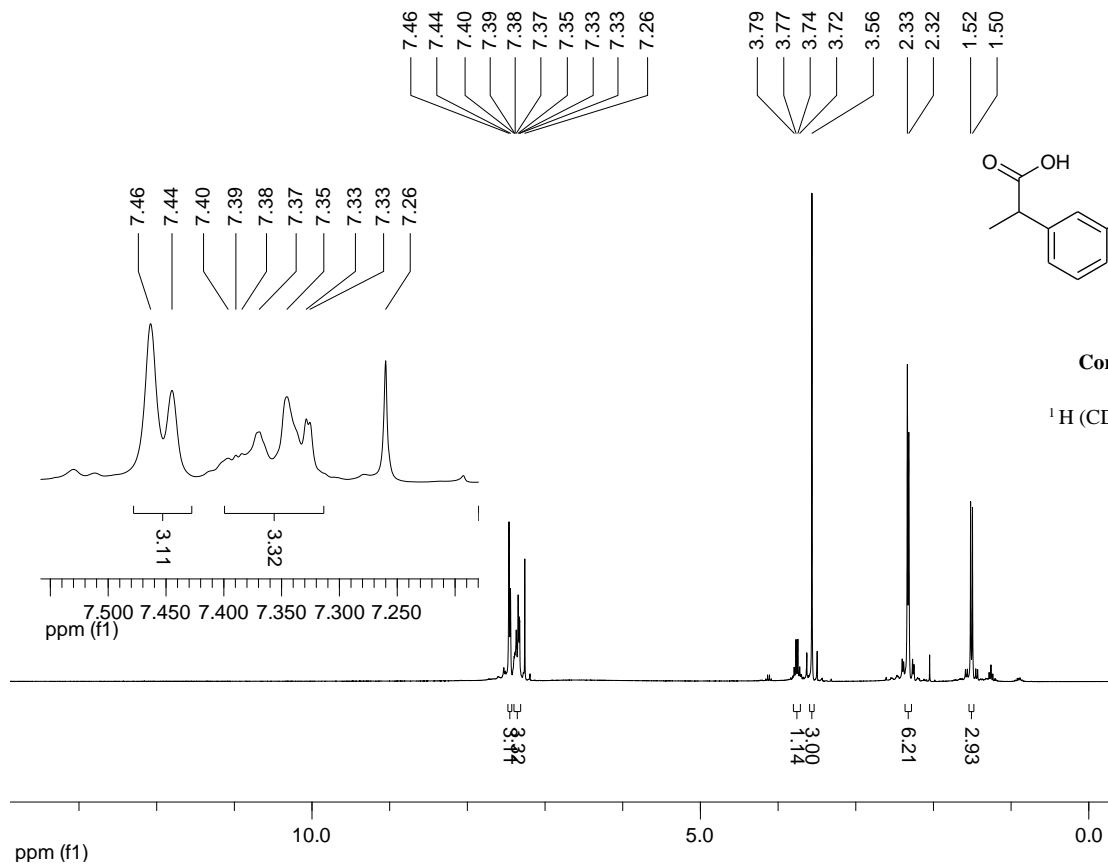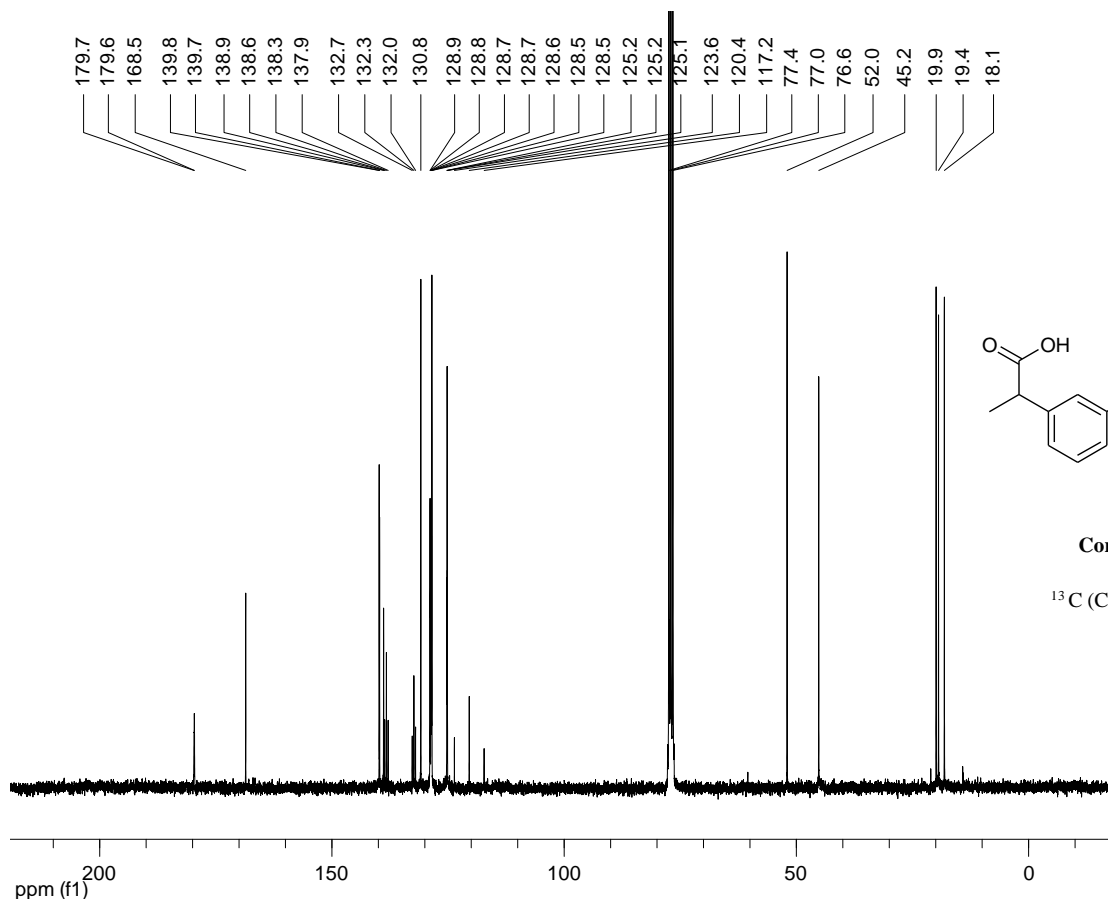

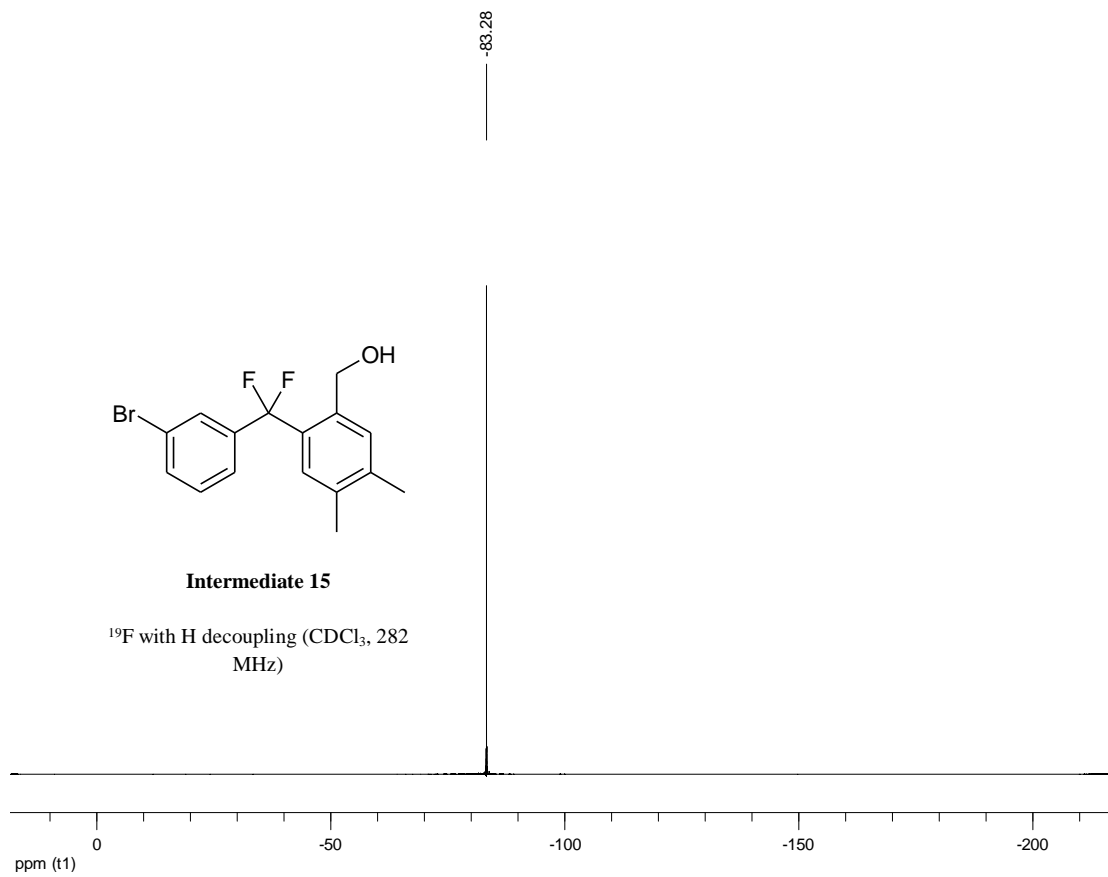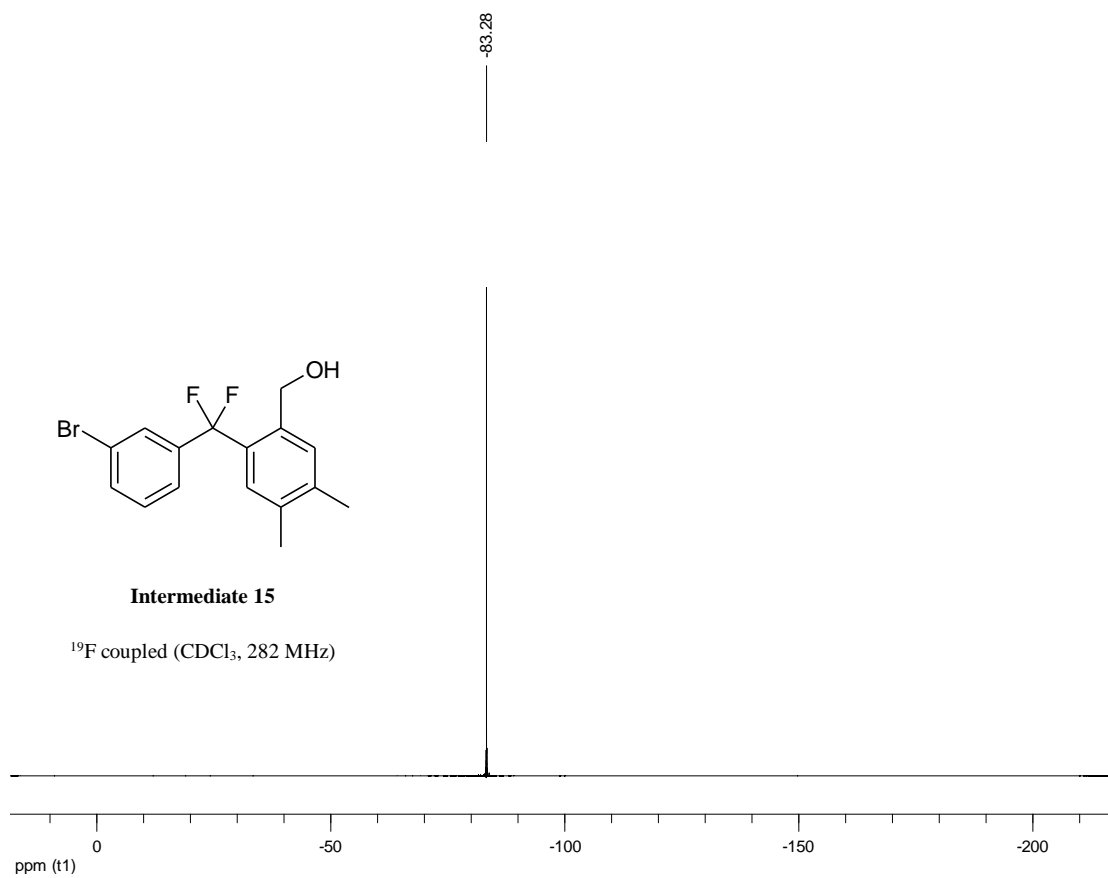

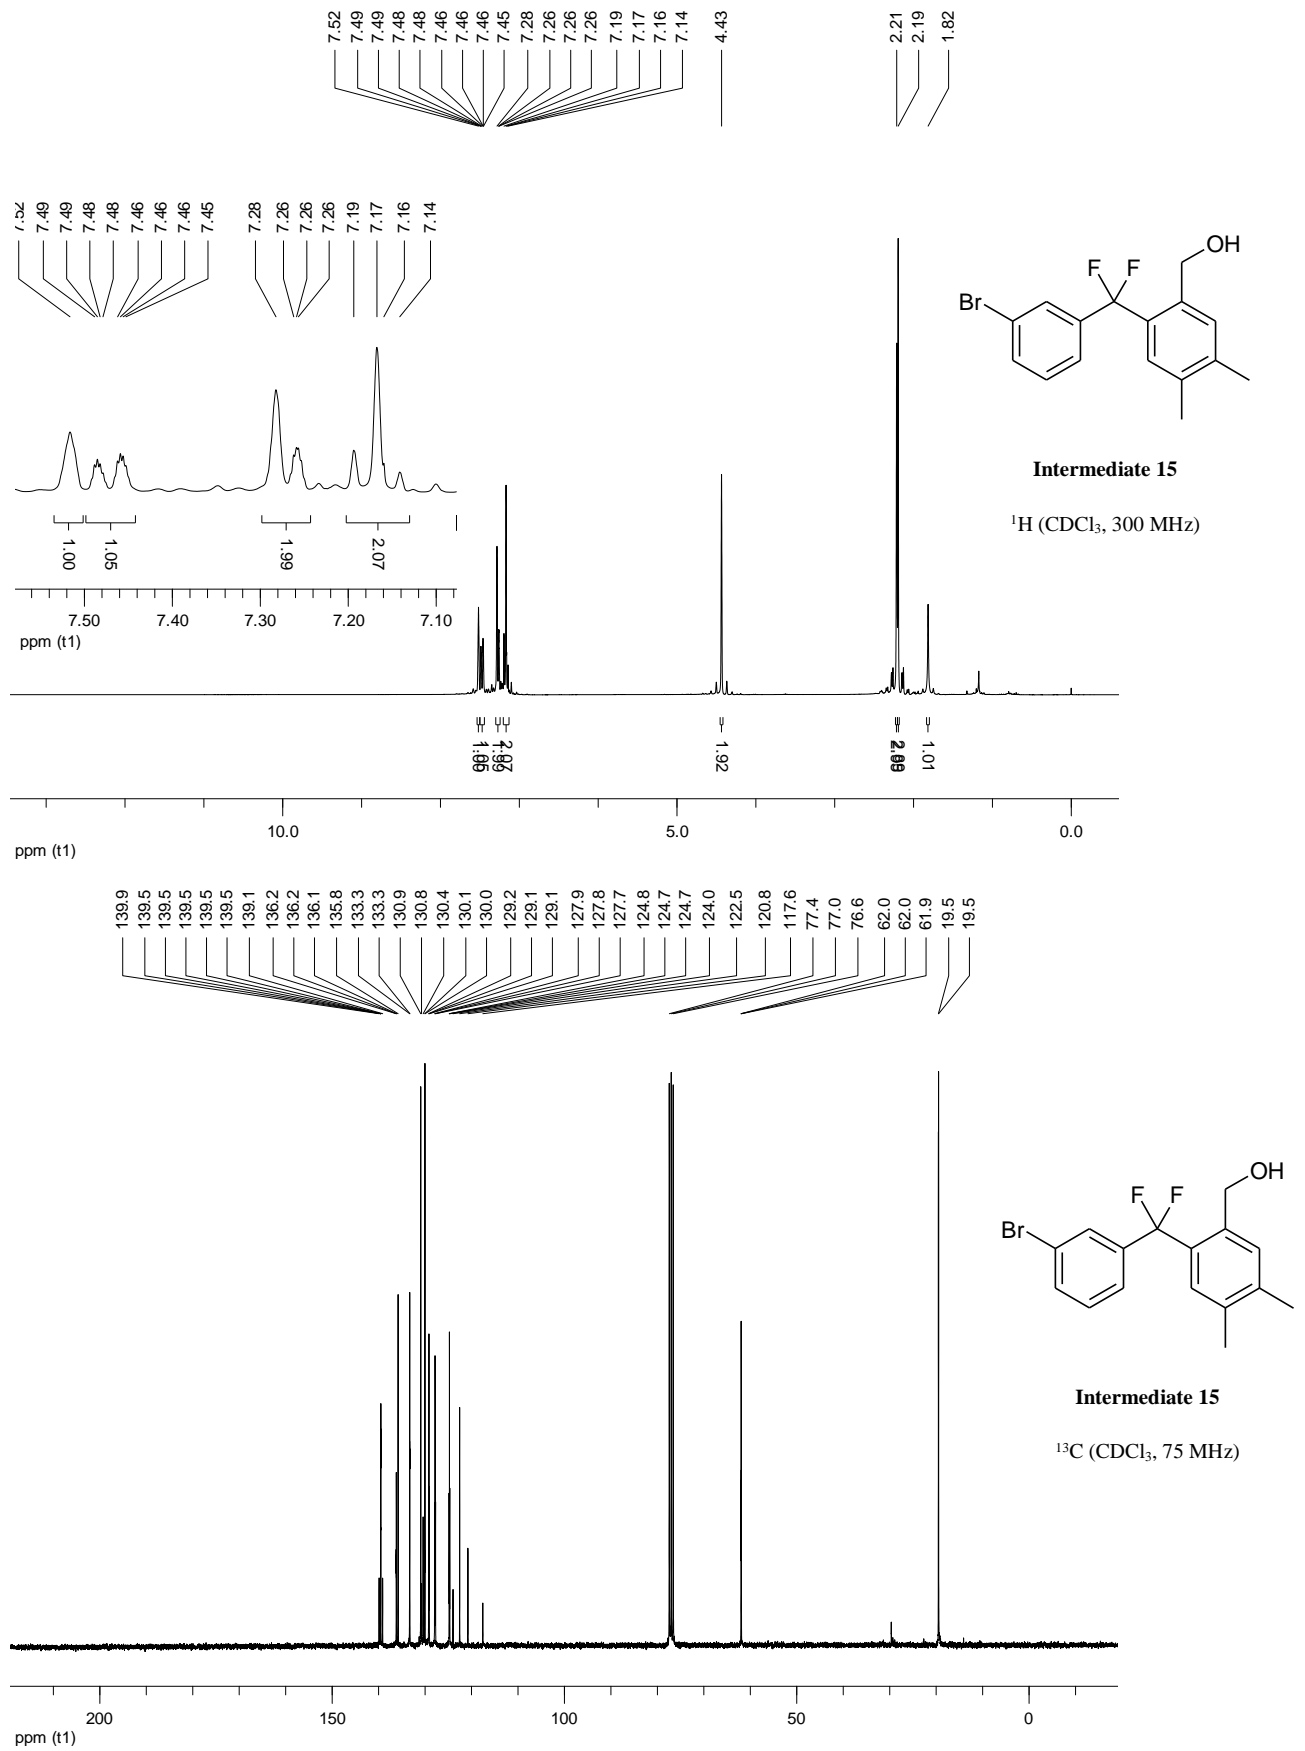

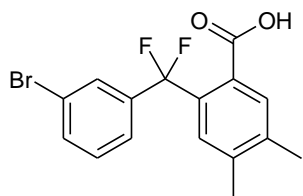

**Compound A3**

$^{19}\text{F}$  with H decoupling ( $\text{CDCl}_3$ , 282 MHz)

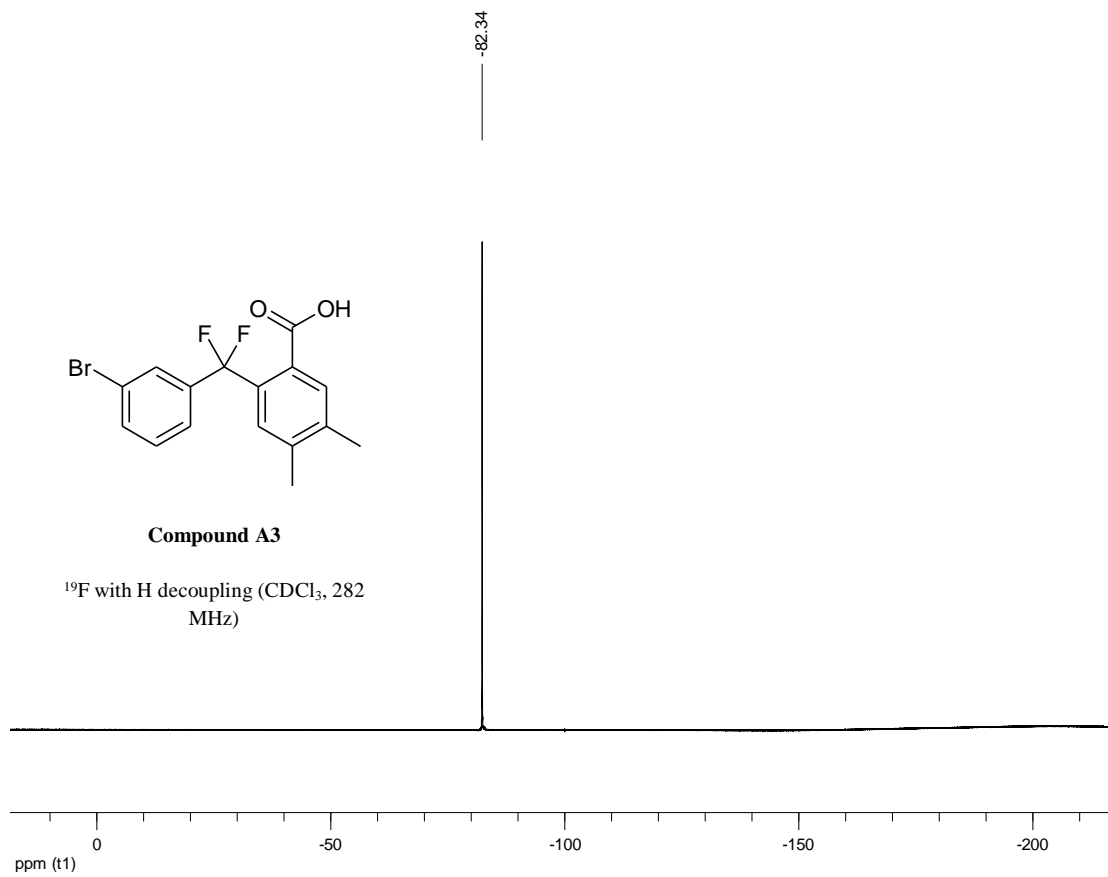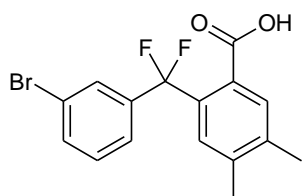

**Compound A3**

$^{19}\text{F}$  coupled ( $\text{CDCl}_3$ , 282 MHz)

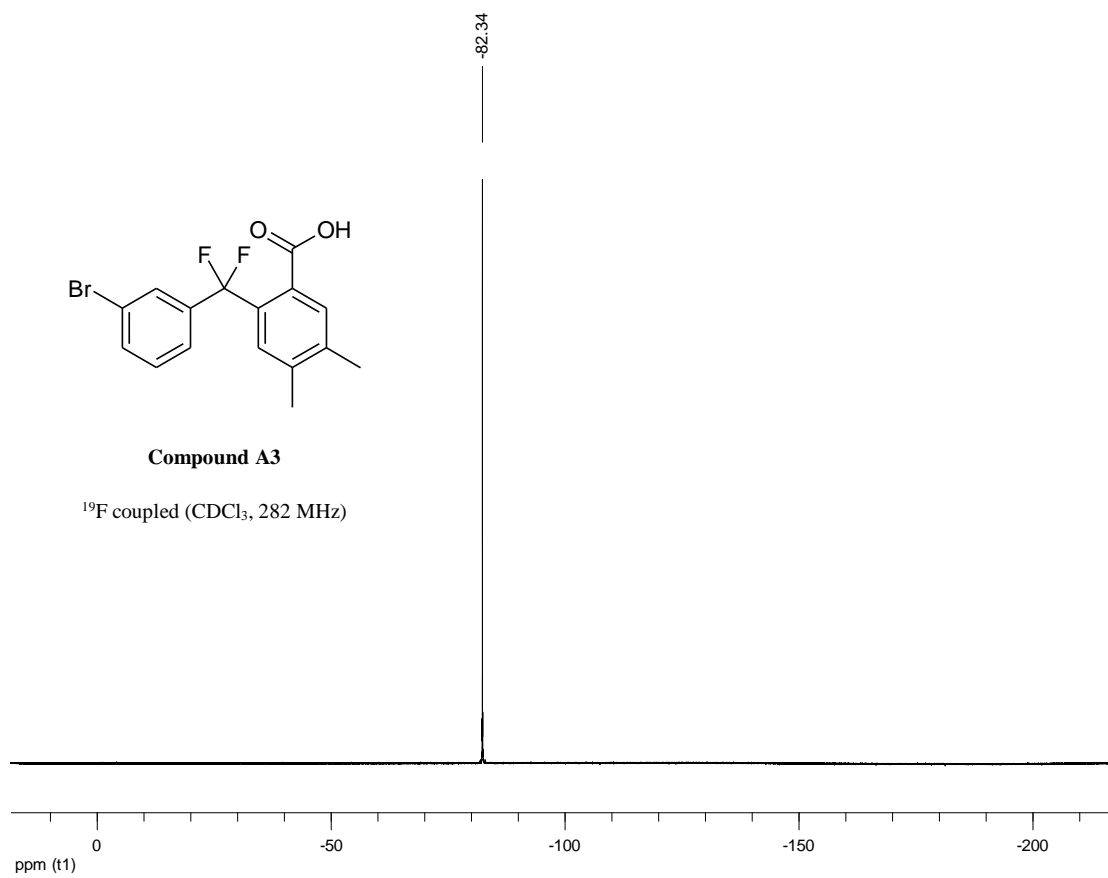

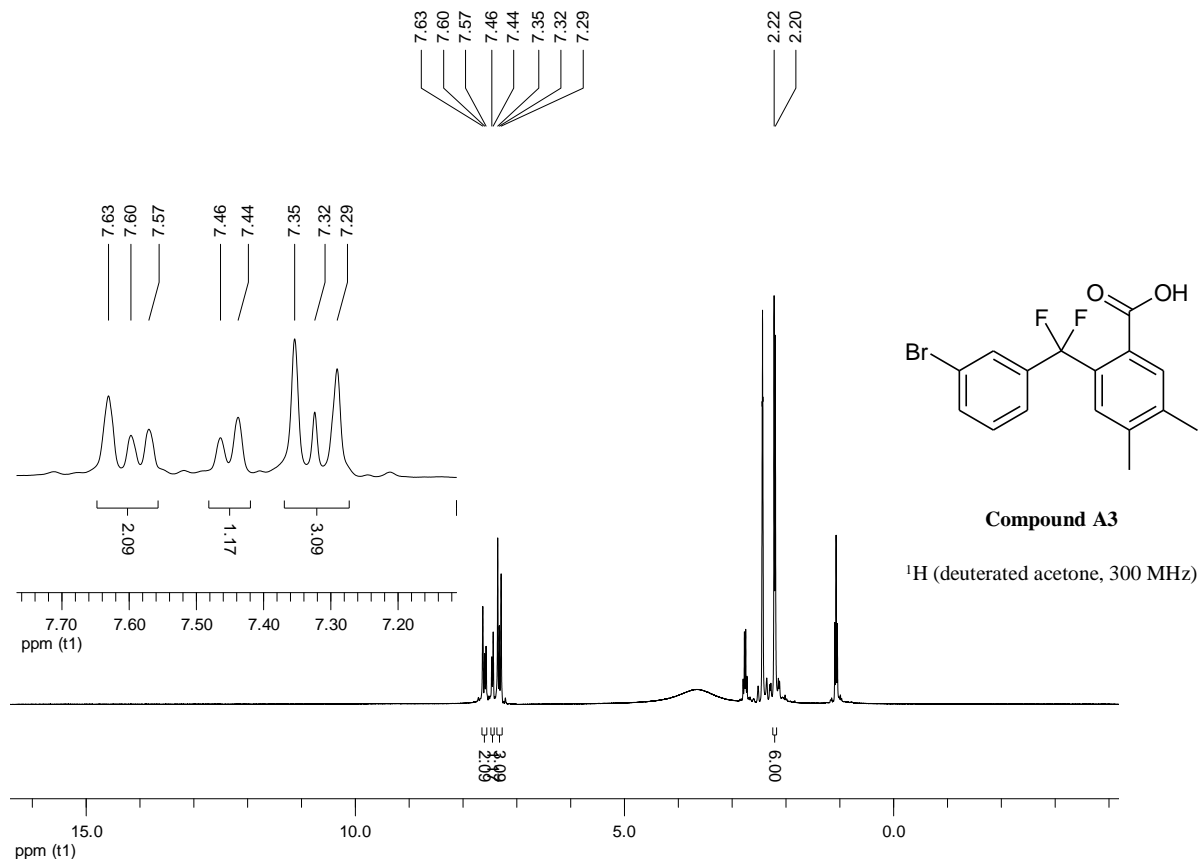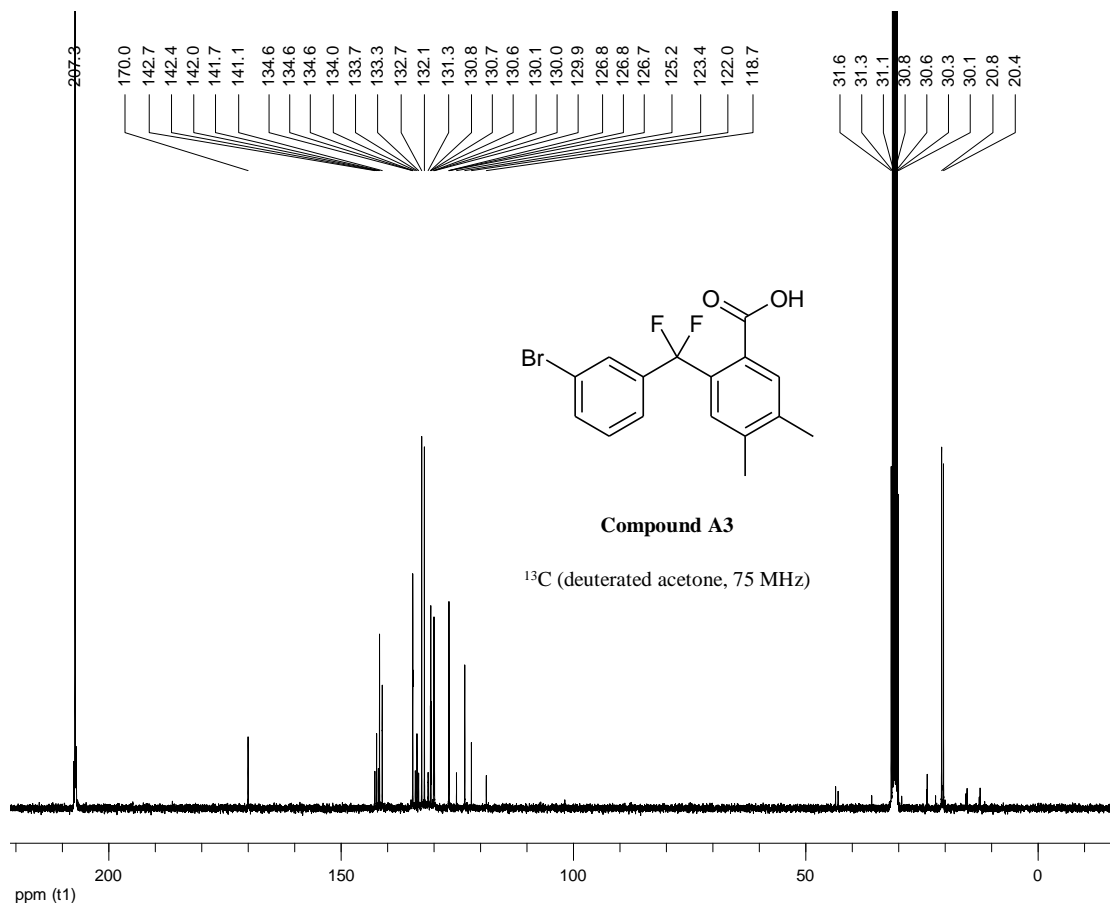



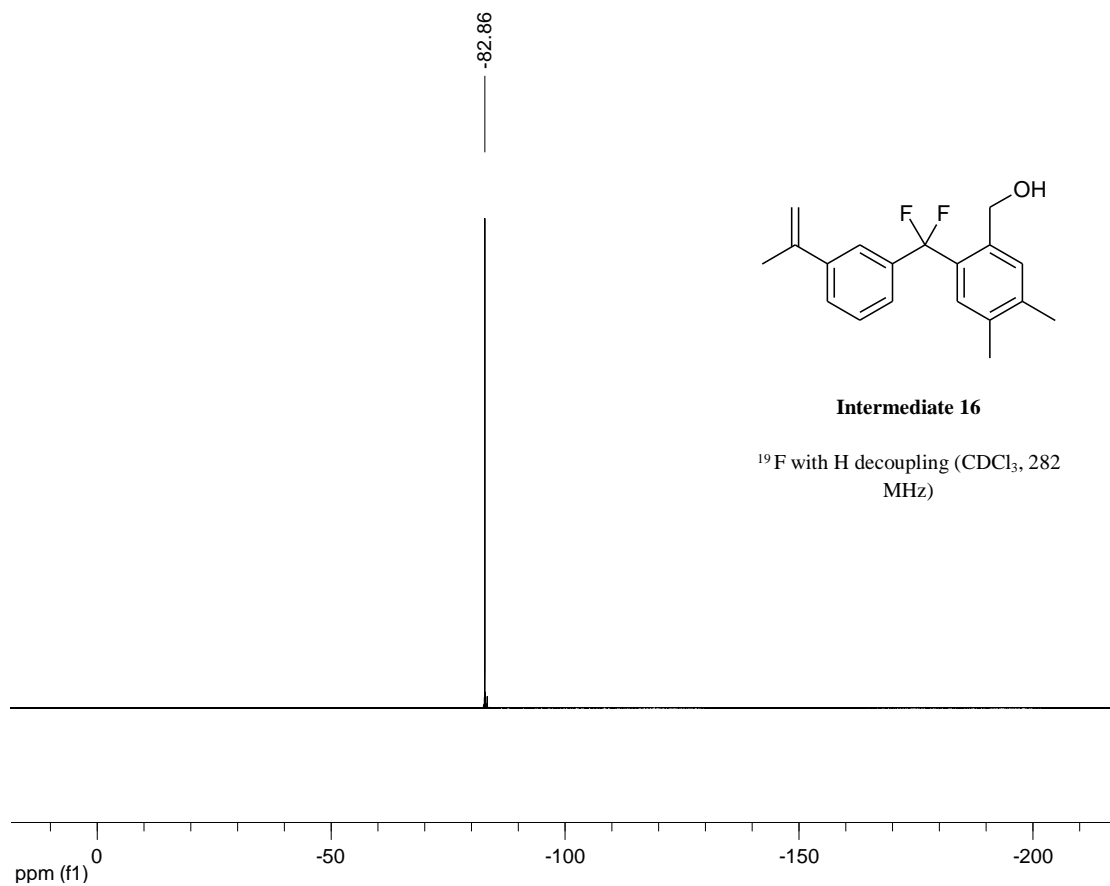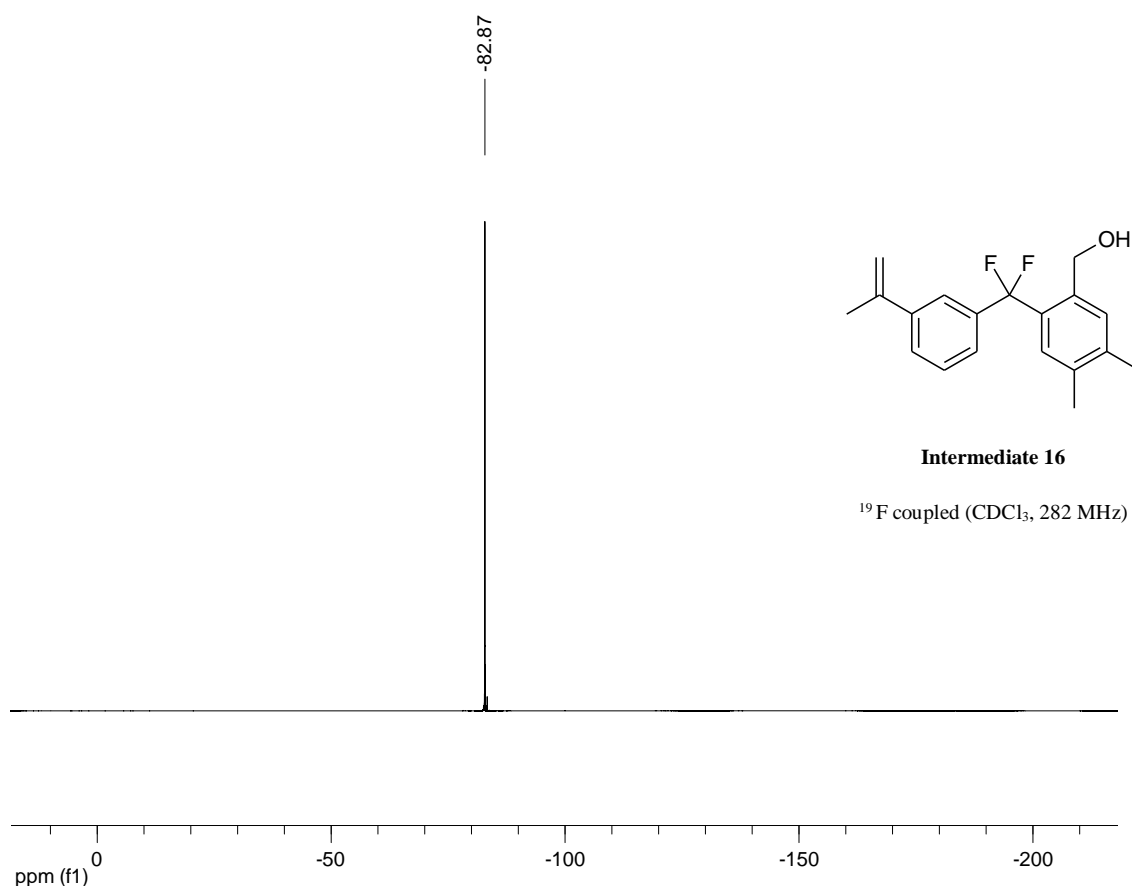

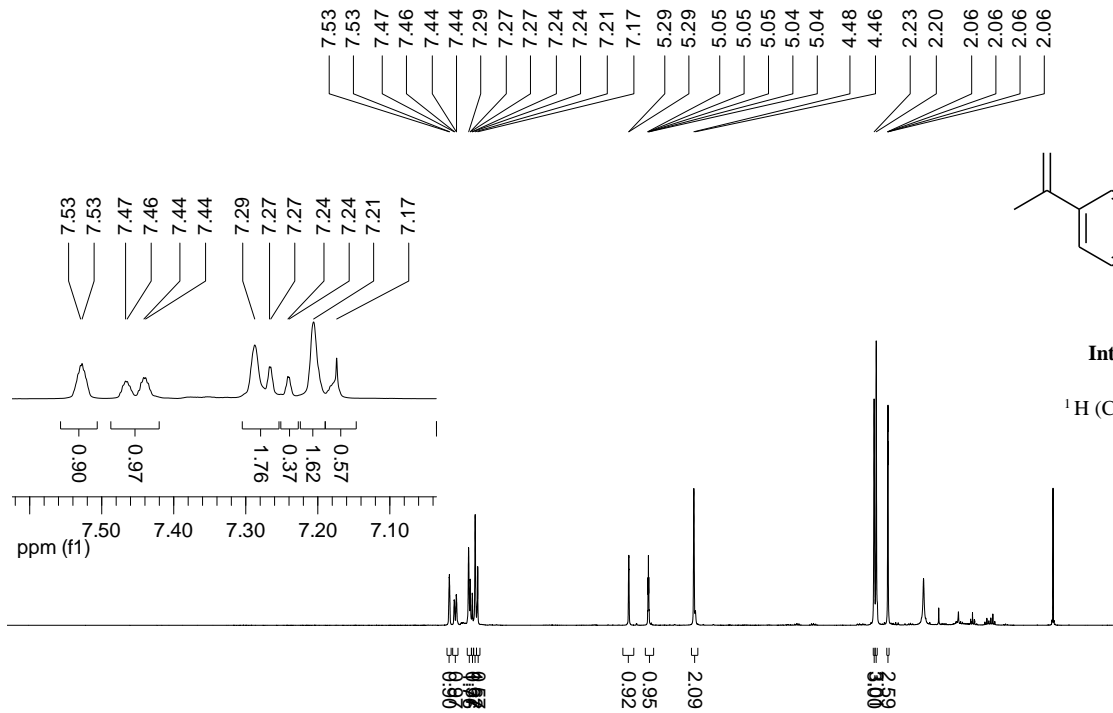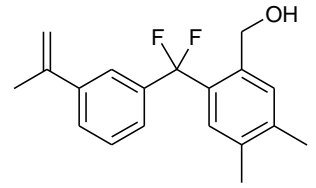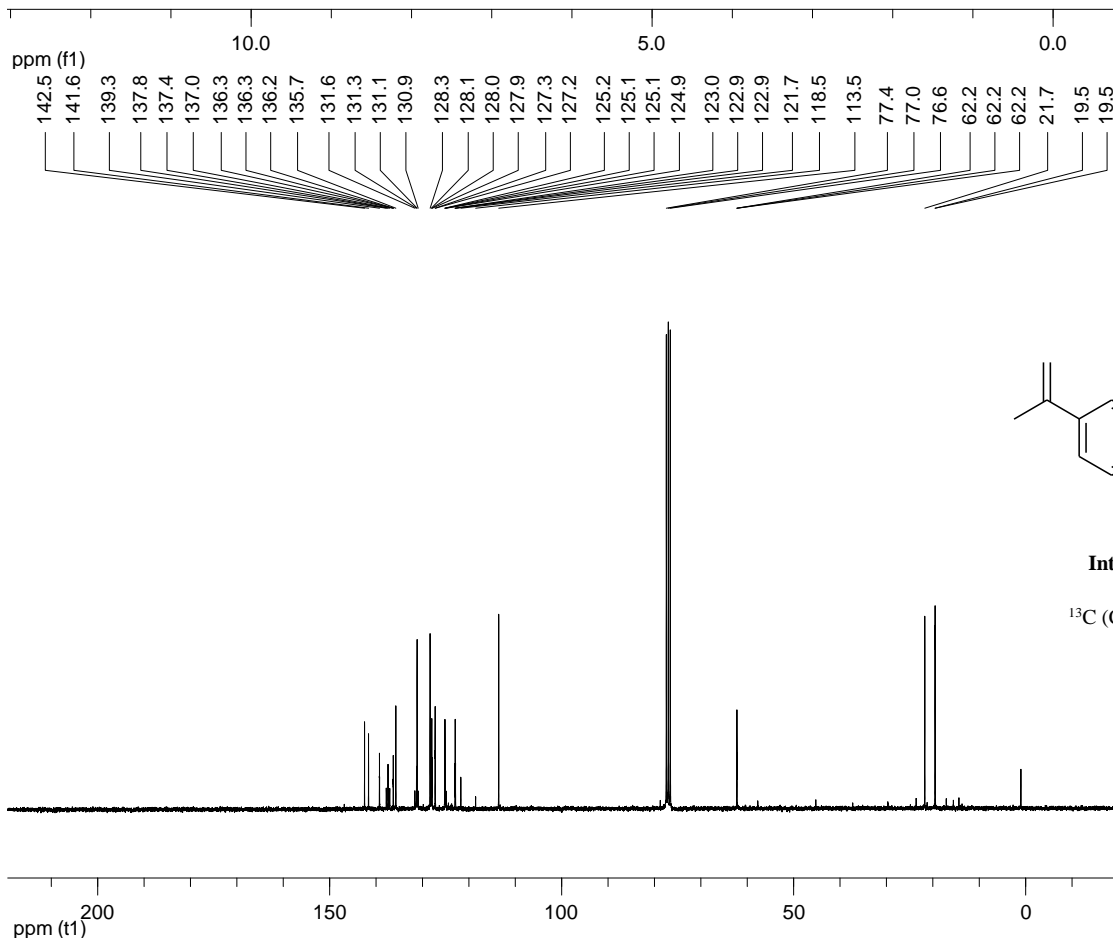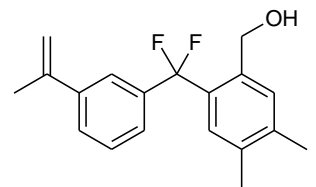

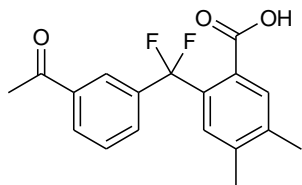

**Compound A4**

$^{19}\text{F}$  with H decoupling ( $\text{CDCl}_3$ , 282 MHz)

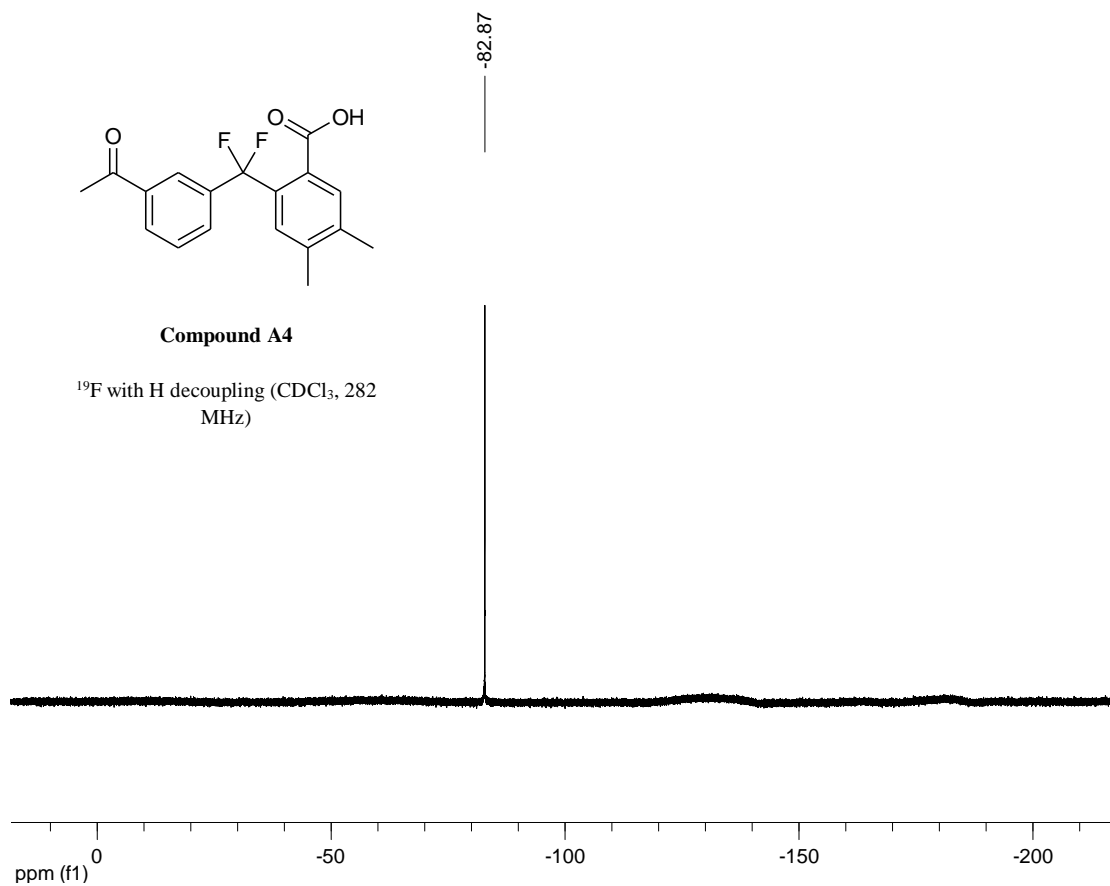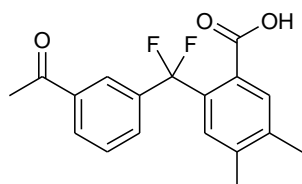

**Compound A4**

$^{19}\text{F}$  coupled ( $\text{CDCl}_3$ , 282 MHz)

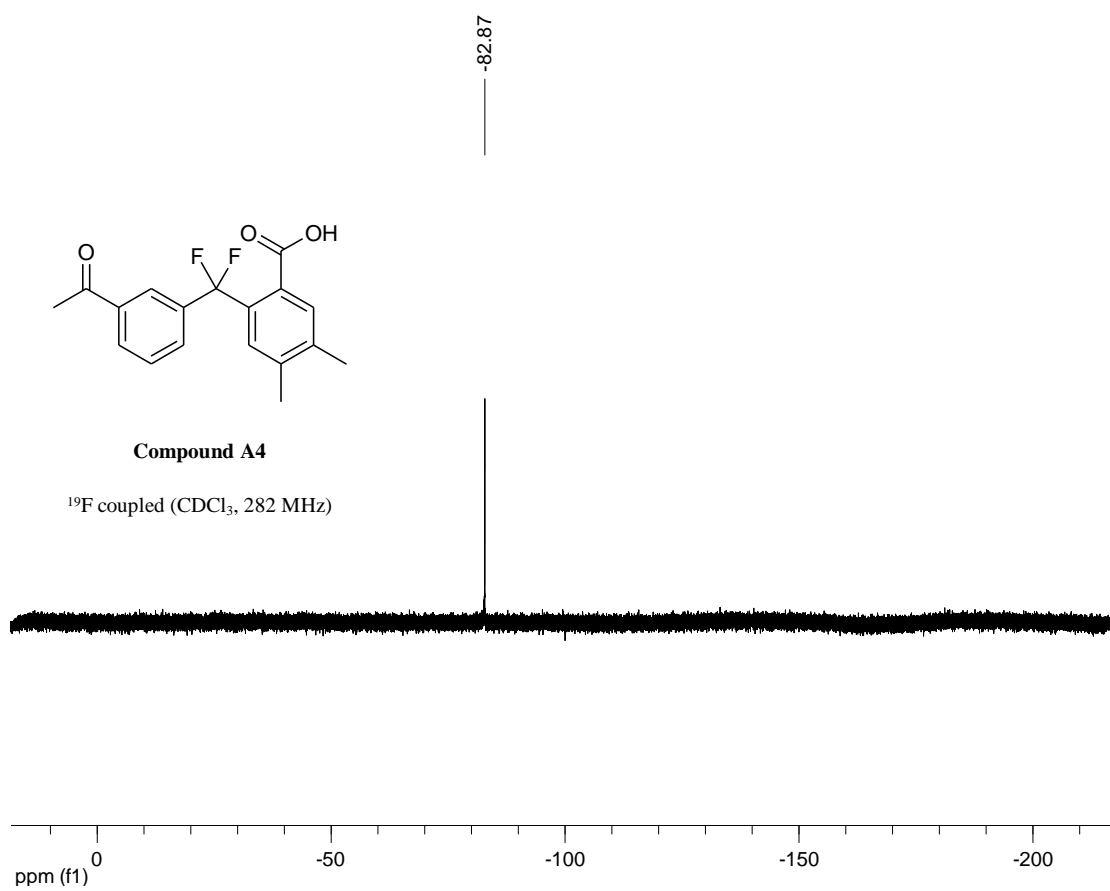

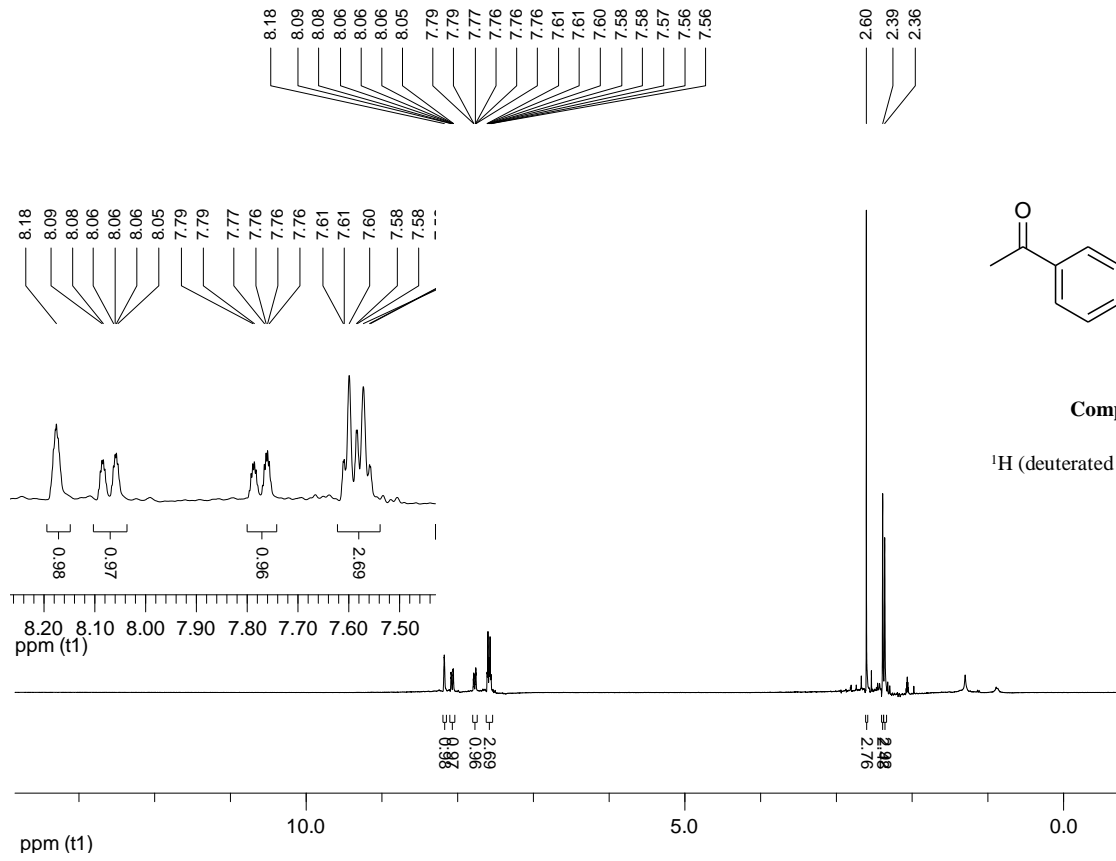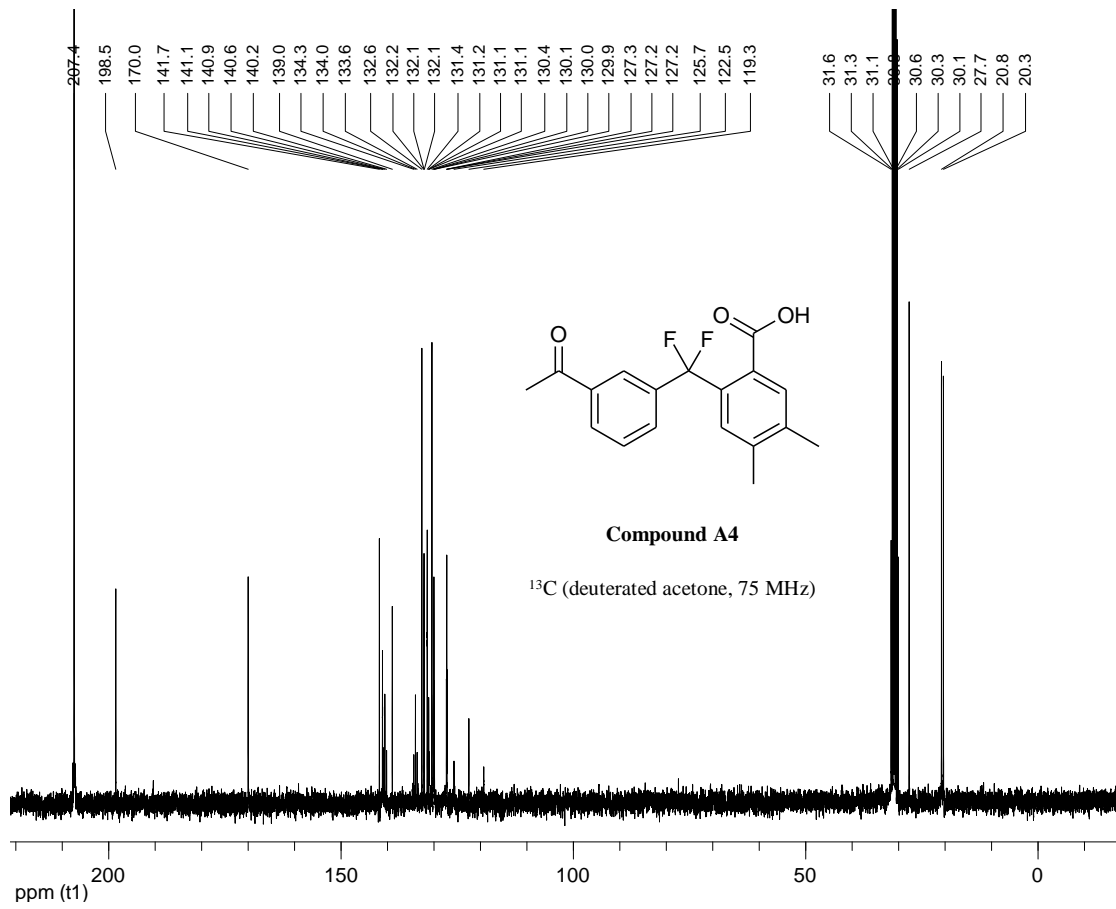

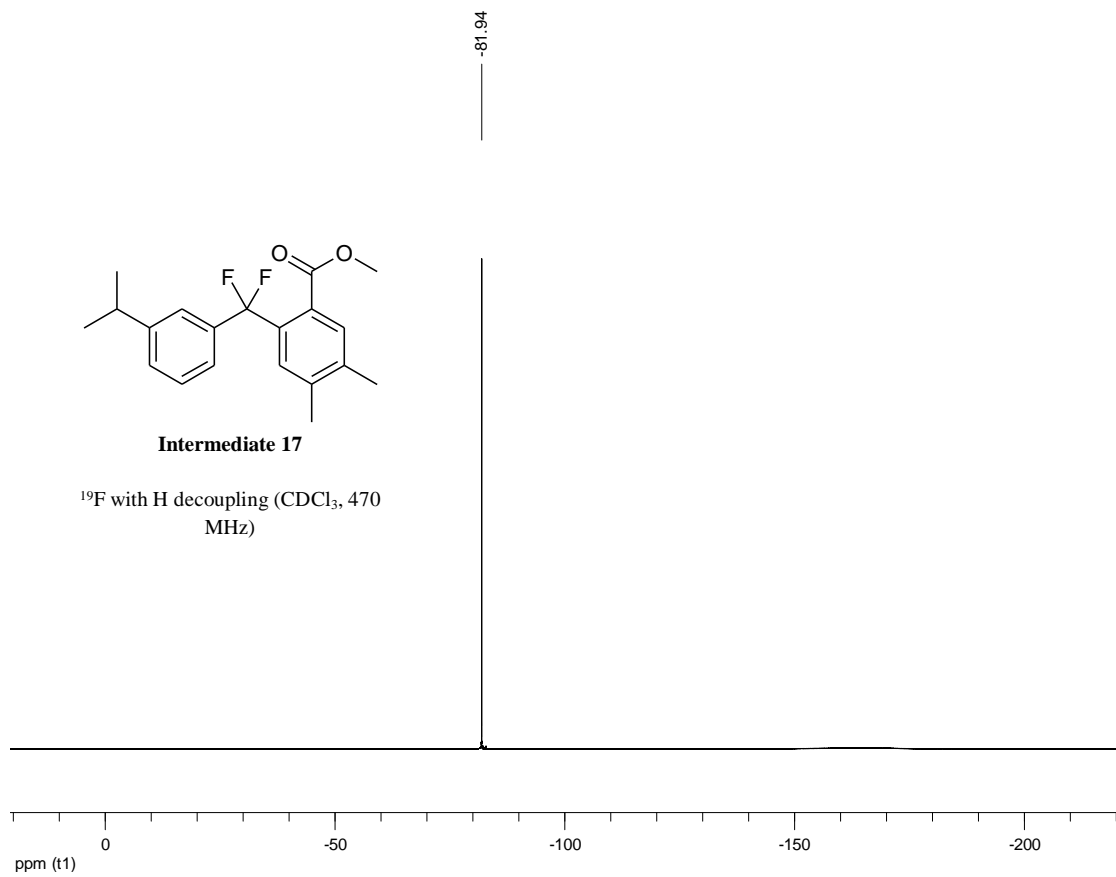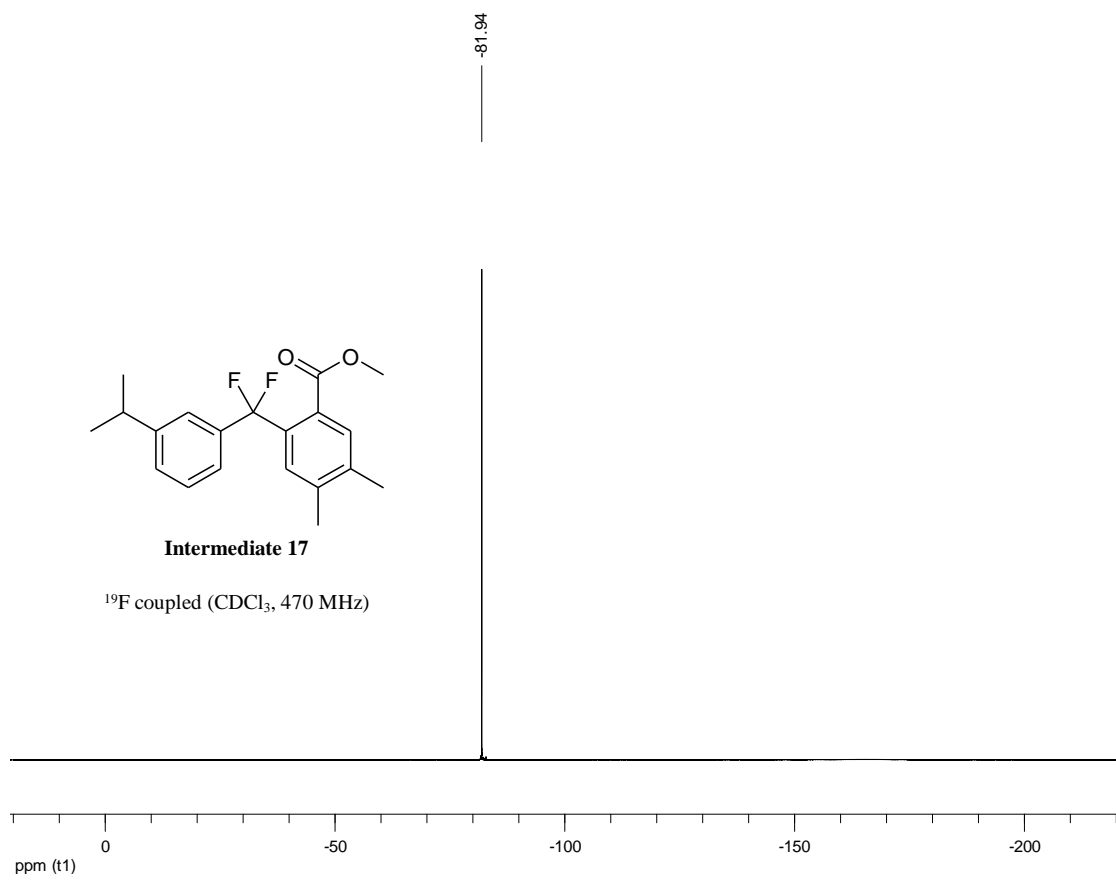

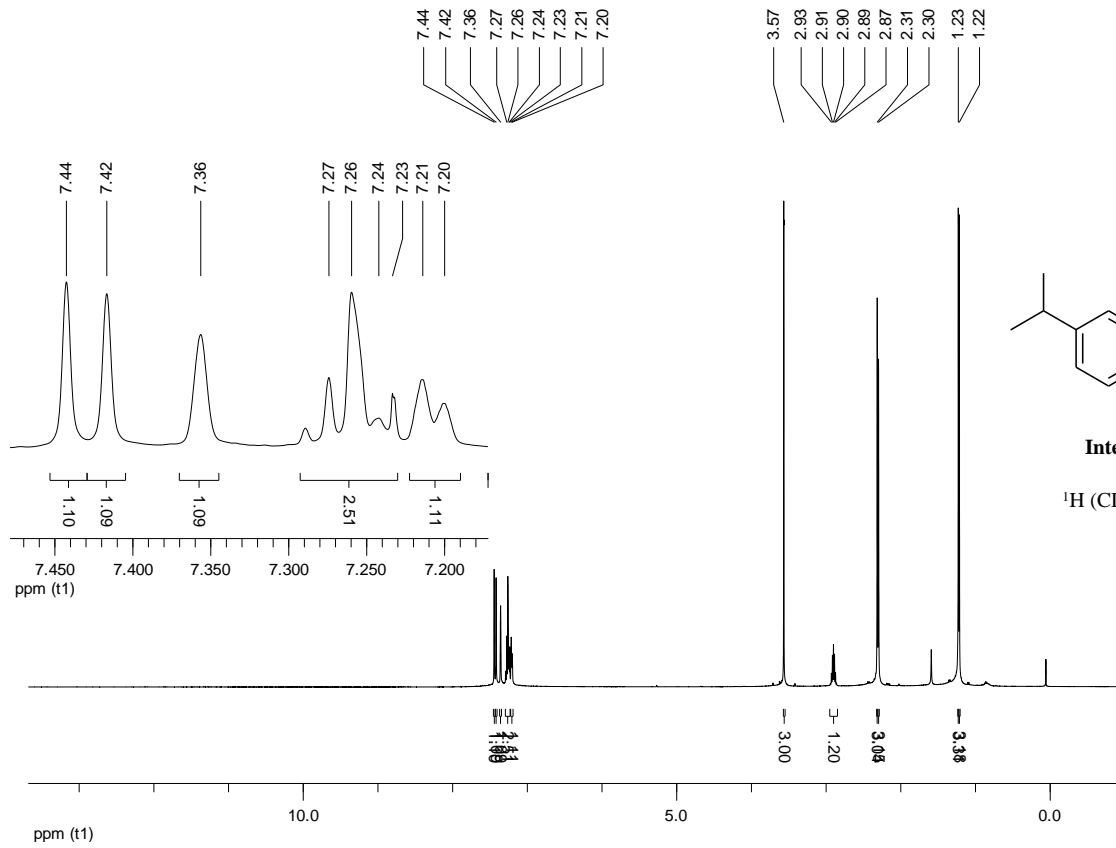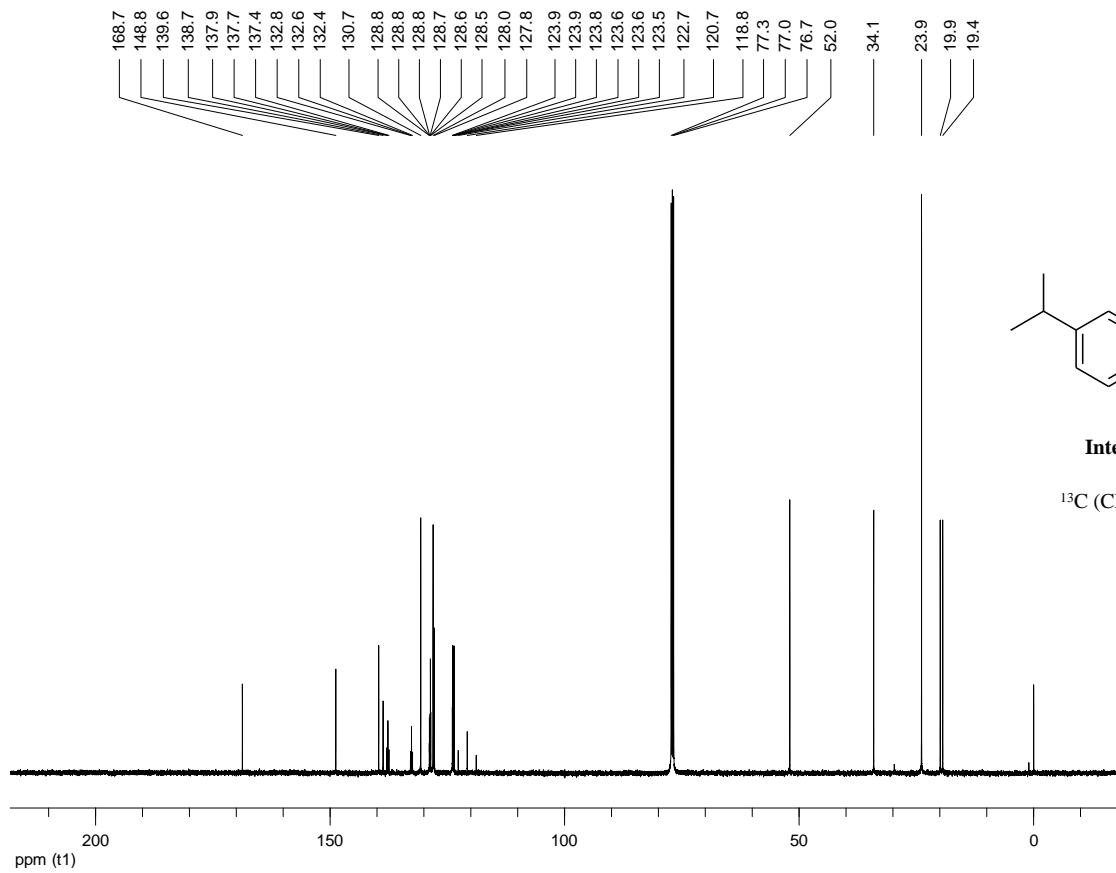

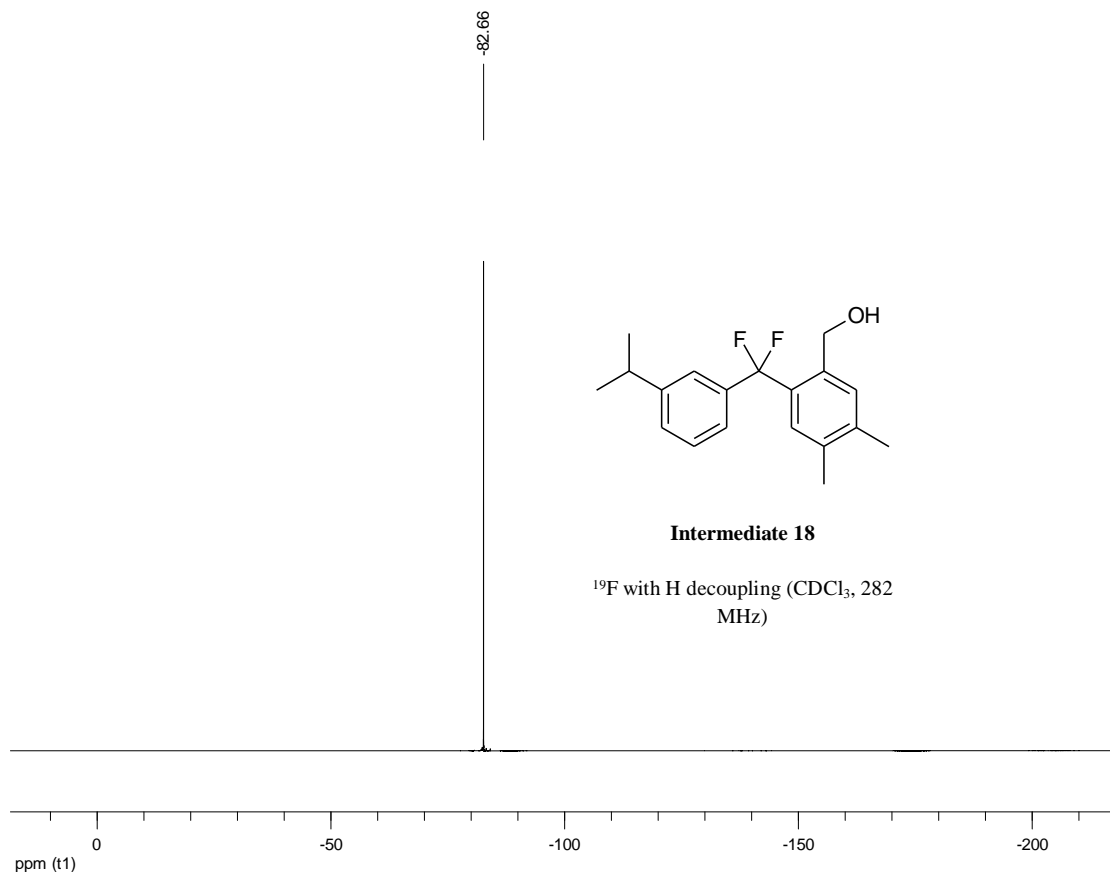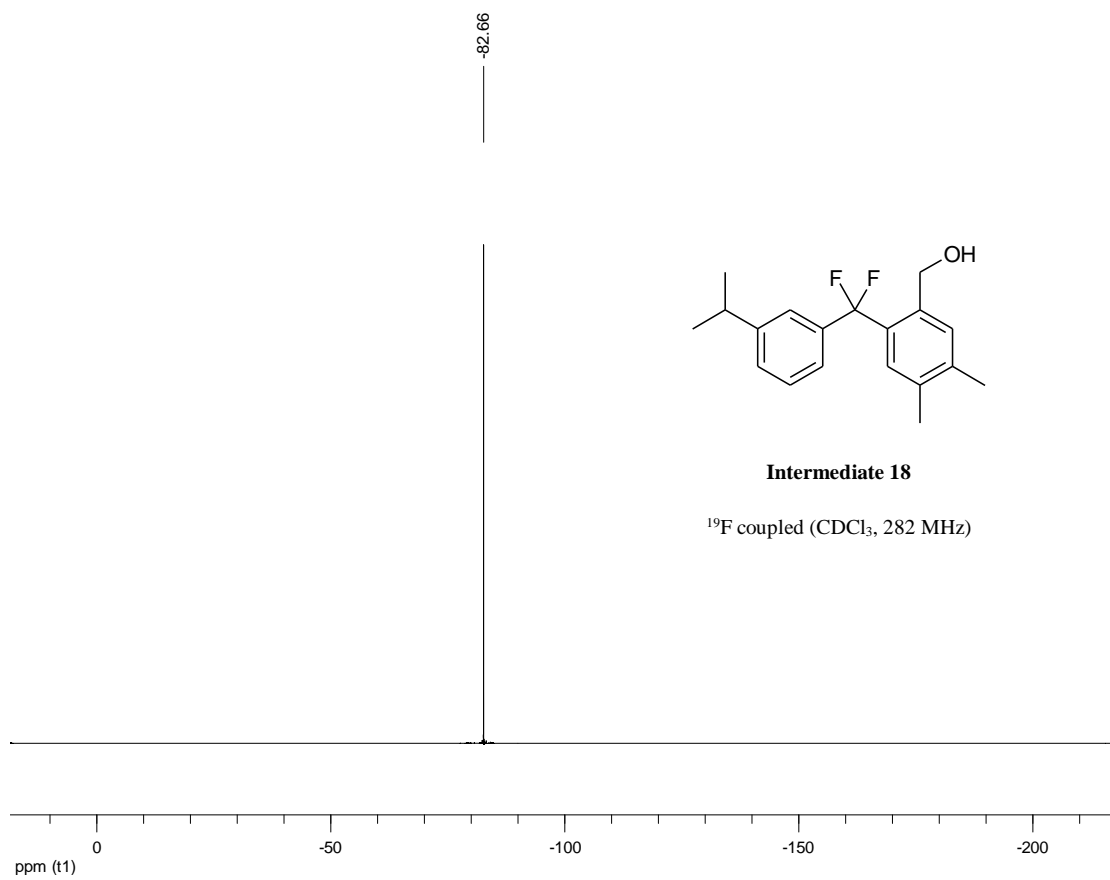

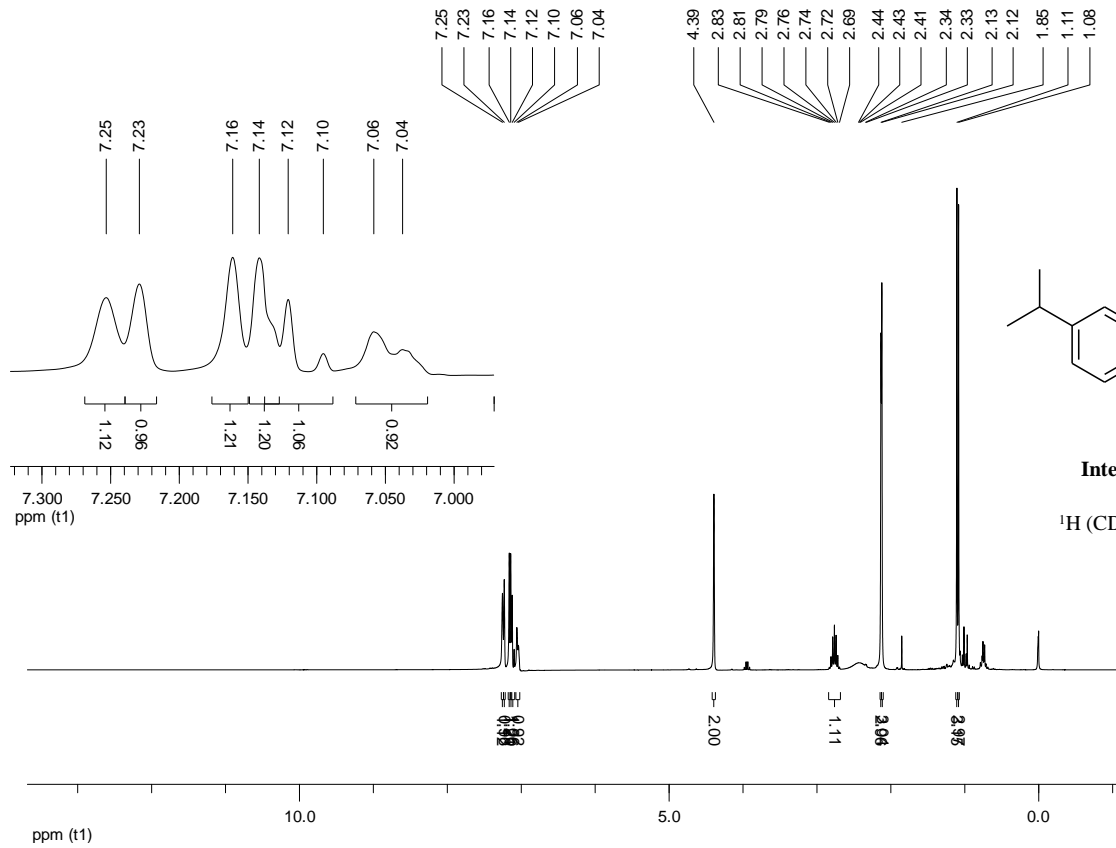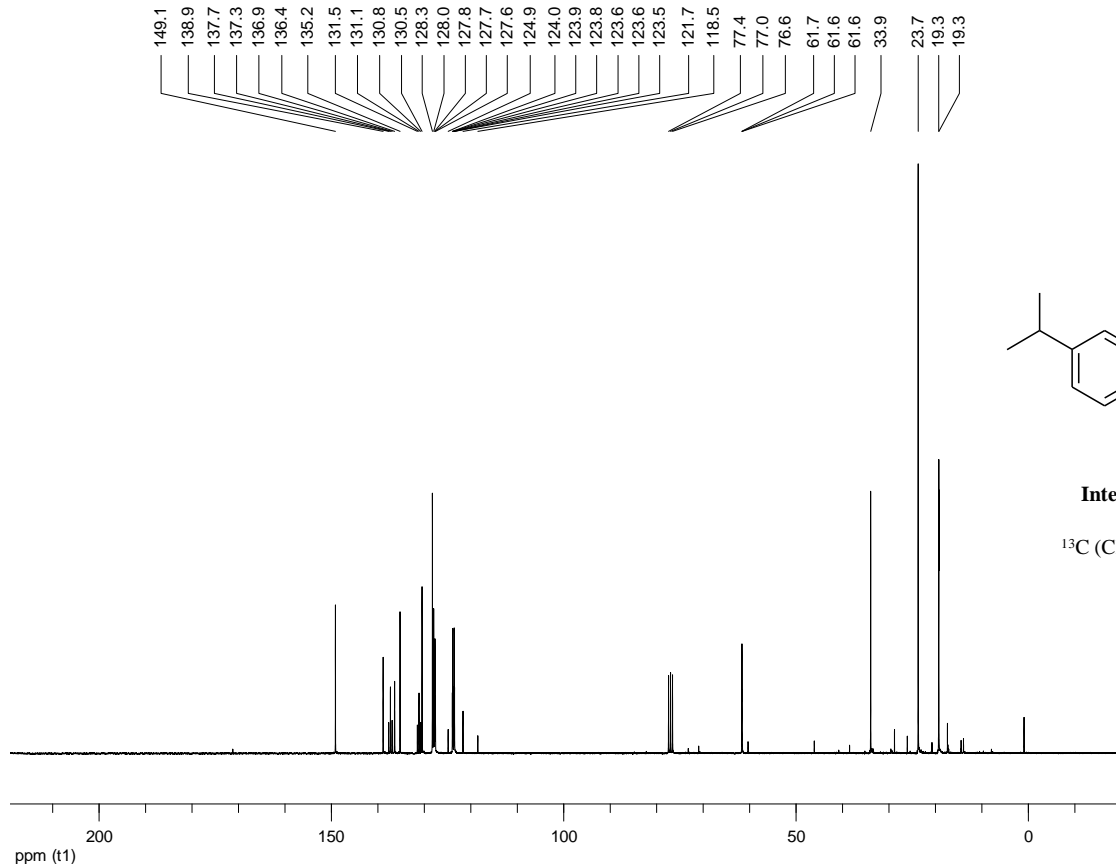



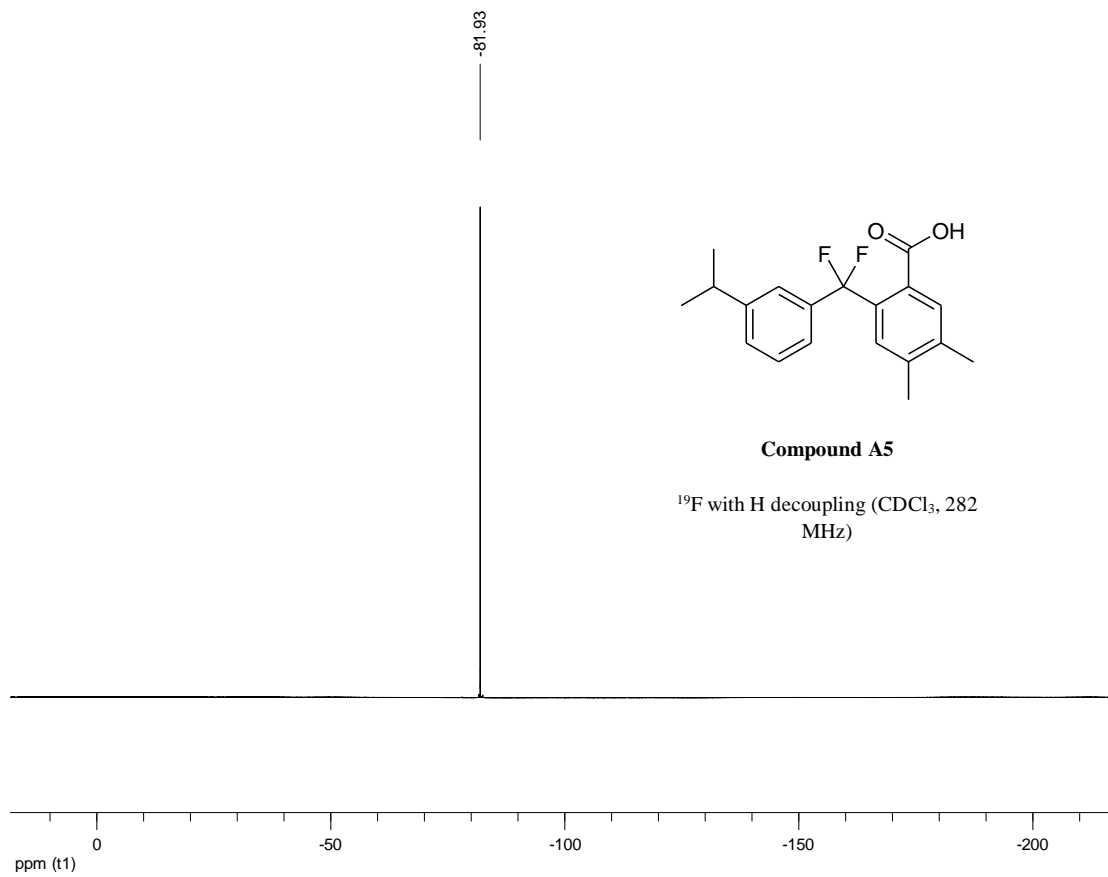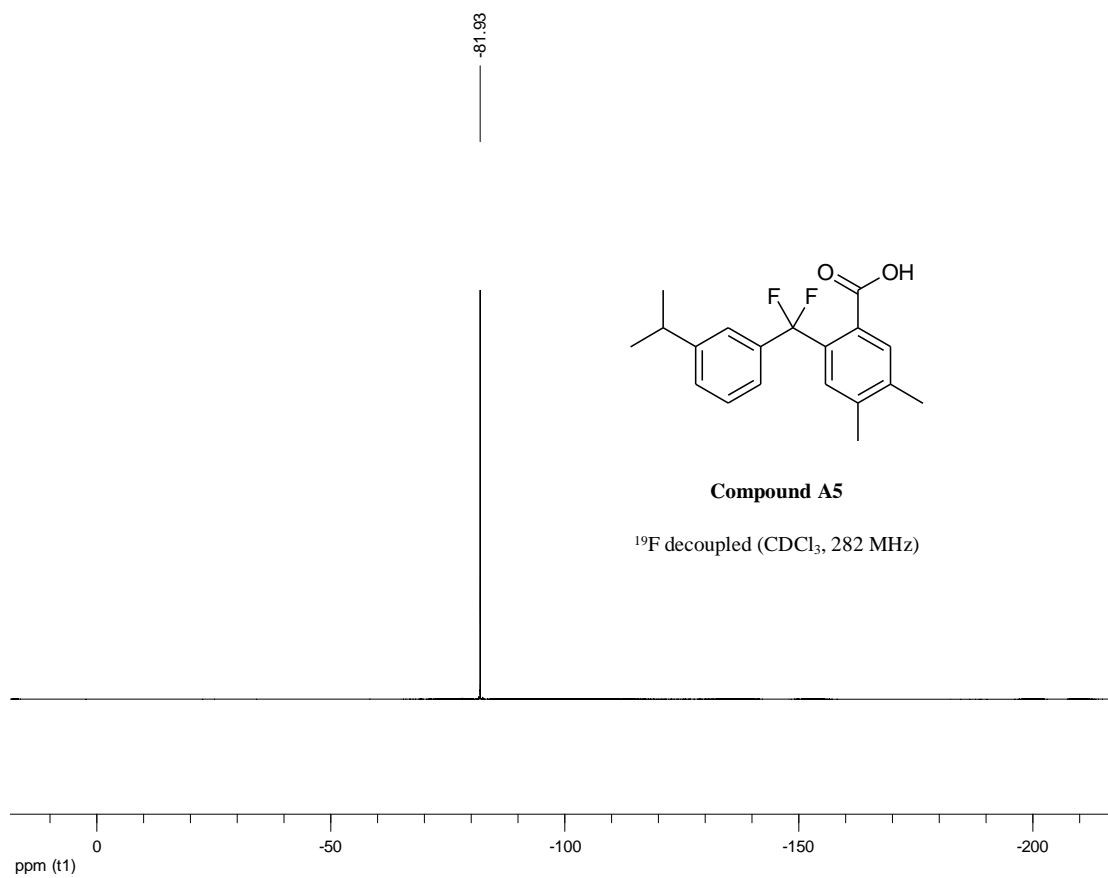

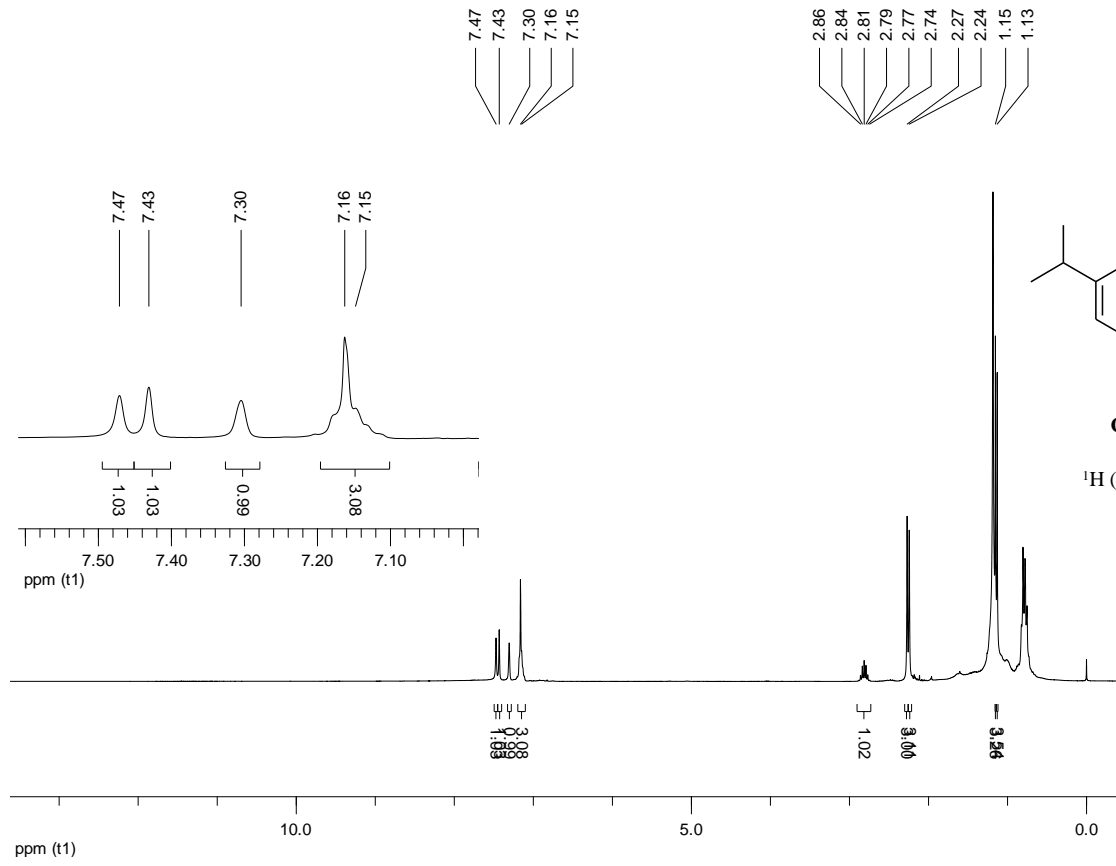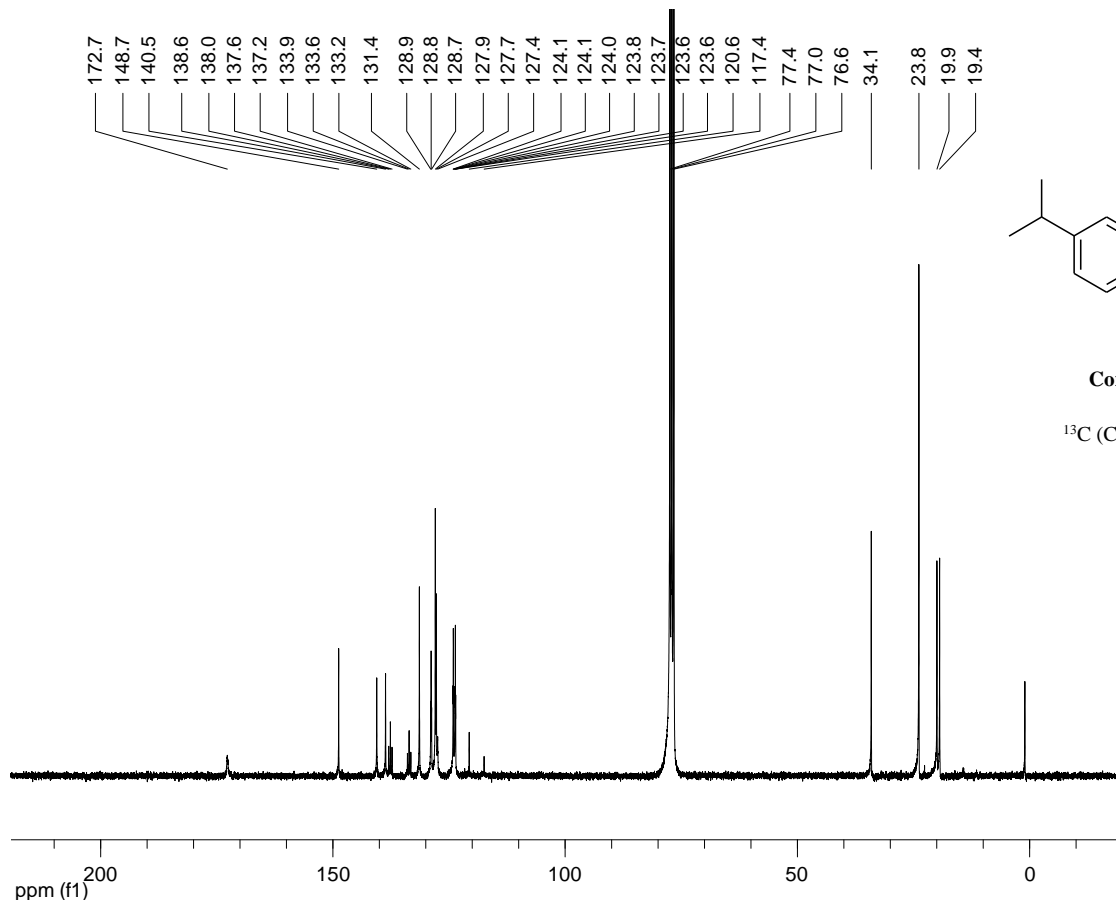

Supplement: 13065_2019_640_MOESM1_ESM.pdf [file 13065_2019_640_MOESM1_ESM.pdf]
